# Supplementary material for: Pyridylacetic acids and related systems as alkylheteroarene surrogates in asymmetric decarboxylative Michael addition
Source: Royal Society of Chemistry journal article supplement (doi:10.1039/d0cc08182e), 2021-01-01

## Pyridylacetic acids and related systems as alkylheteroarene surrogates in the asymmetric decarboxylative Michael addition

Sebastian Frankowski,<sup>a</sup> Justyna Kowalska,<sup>a</sup> Anna Albrecht<sup>a\*</sup>

<sup>a</sup> Institute of Organic Chemistry, Department of Chemistry, Lodz University of Technology, Żeromskiego 116,  
90-924 Łódź, Poland

[anna.albrecht@p.lodz.pl](mailto:anna.albrecht@p.lodz.pl)

### Contents

|     |                                                                                                 |     |
|-----|-------------------------------------------------------------------------------------------------|-----|
| 1.  | General methods                                                                                 | S2  |
| 2.  | Asymmetric decarboxylative Michael addition – general procedure                                 | S3  |
| 3.  | Crystal and X-ray data for <b>6a</b>                                                            | S12 |
| 4.  | Synthesis of methyl ( <i>R</i> )-5-phenyl-6-(pyridin-2-yl)hexanoate <b>13</b>                   | S14 |
| 5.  | Synthesis of ( <i>R,E</i> )-2-(6-methoxy-6-oxo-2-phenylhex-4-en-1-yl)pyridine 1-oxide <b>14</b> | S15 |
| 6.  | Synthesis of methyl ( <i>S</i> )-3-phenyl-4-(pyridin-2-yl)butanoate <b>15</b>                   | S16 |
| 7.  | Synthesis of ( <i>R</i> )- <i>N</i> -(3-phenyl-4-(pyridin-2-yl)butyl)aniline <b>16</b>          | S17 |
| 8.  | NMR Data                                                                                        | S18 |
| 9.  | HPLC Data                                                                                       | S35 |
| 10. | Mechanistic considerations using MS analysis                                                    | S52 |
| 11. | Additional scope experiment                                                                     | S53 |

## 1. General methods

NMR spectra were acquired on a Bruker Ultra Shield 700 instrument, running at 700 MHz for  $^1\text{H}$  and 176 MHz for  $^{13}\text{C}$ , respectively. Chemical shifts ( $\delta$ ) are reported in ppm relative to residual solvent signals ( $\text{CDCl}_3$ : 7.26 ppm for  $^1\text{H}$  NMR, 77.16 ppm for  $^{13}\text{C}$  NMR). Mass spectra were recorded on a Bruker Maxis Impact spectrometer using electrospray (ES+) ionization (referenced to the mass of the charged species). Analytical thin layer chromatography (TLC) was performed using pre-coated aluminum-backed plates (Merck Kieselgel 60 F254) and visualized by ultraviolet irradiation or  $\text{I}_2$  stain. Unless otherwise noted, analytical grade solvents and commercially available reagents were used without further purification. For flash chromatography (FC) silica gel (Silica gel 60, 230-400 mesh, Fluka). The enantiomeric ratio (er) of the products were determined by Ultra Performance Convergence Chromatography (UPC<sup>2</sup>) or HPLC using Daicel Chiralpak IA, IB, IC and IG columns as chiral stationary phases. Aldehyde **2i** was synthesized according to the literature procedure.<sup>1</sup> Pyridine and heterocyclic derivatives **9**, **11a**, **11b** were prepared from the corresponding starting materials following the literature procedure.<sup>2</sup>

---

<sup>1</sup> G. Sirasani, T. Paul Rodrigo and B. Andrade, *Tetrahedron* 2011, **67**, 2197-2205.

<sup>2</sup> (a) T. L. Gilchrist and A. Rahman, *J. Chem. Soc., Perkin Trans. 1*, 1998, **7**, 1203-1208; (b) R. Shang, Z.-W. Yang, Y. Wang, S.-L. Zhang and L. Liu, *J. Am. Chem. Soc.* 2010, **132**, 14391-14393.

## 2. Asymmetric decarboxylative Michael addition – general procedure

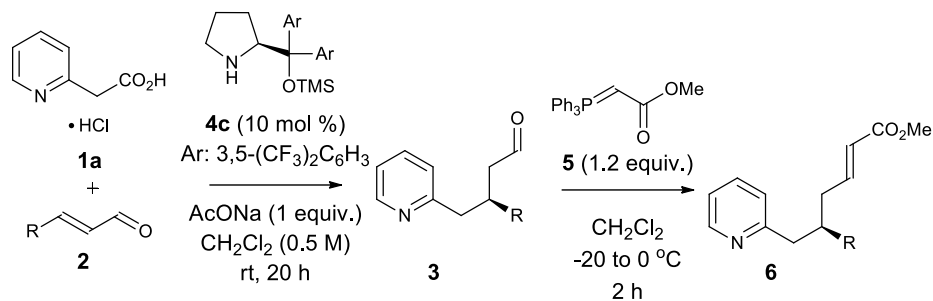

In an ordinary 4 mL glass vial equipped with a magnetic stirring bar, 2-pyridylacetic acid hydrochloride **1a** (17.3 mg; 0.1 mmol),  $\alpha,\beta$ -unsaturated aldehyde **2** (0.1 mmol) and catalyst **4c** (6.0 mg, 0.01 mmol) were placed. Subsequently, dichloromethane (0.2 mL) and sodium acetate (8.2 mg, 0.1 mmol) were added. The progress of the reaction was controlled by <sup>1</sup>H NMR spectroscopy. After full conversion of the starting material **2**, the reaction mixture was diluted with dichloromethane (1 mL) and cooled to -20 °C. Then (methoxycarbonylmethylene)triphenylphosphorane **5** (40 mg; 0.12 mmol) was added to the vial and stirred at 0 °C for 2 hours. Subsequently, the solvent was removed under reduced pressure and the obtained residue was directly subjected to flash chromatography on silica gel to afford pure product **6**.

### Methyl (*R,E*)-5-phenyl-6-(pyridin-2-yl)hex-2-enoate (**6a**)

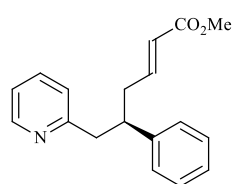

Compound **6a** was obtained according to general procedure from (*E*)-3-phenylprop-2-enal **2a** in 67% yield (18.9 mg) after purification by FC (*n*-hexane:ethyl acetate; gradient from 3:1 to 1:1). <sup>1</sup>H NMR (700 MHz, CDCl<sub>3</sub>)  $\delta$  8.51 (ddd,  $J$  = 4.9, 1.9, 0.9 Hz, 1H), 7.44 (td,  $J$  = 7.6, 1.8 Hz, 1H), 7.24 – 7.20 (m, 2H), 7.17 – 7.13 (m, 1H), 7.12 – 7.09 (m, 2H), 7.04 (ddd,  $J$  = 7.5, 4.9, 1.2 Hz, 1H), 6.85 (dt,  $J$  = 7.8, 1.1 Hz, 1H), 6.80 (dt,  $J$  = 15.6, 7.3 Hz, 1H), 5.72 (dt,  $J$  = 15.6, 1.5 Hz, 1H), 3.64 (s, 3H), 3.38 – 3.34 (m,  $J$  = 7.4 Hz, 1H), 3.12 (dd,  $J$  = 13.6, 7.1 Hz, 1H), 3.08 – 3.03 (m, 1H), 2.58 (td,  $J$  = 7.4, 1.5 Hz, 2H). <sup>13</sup>C NMR (176 MHz, CDCl<sub>3</sub>)  $\delta$  166.7, 159.7, 149.2, 147.0, 143.2, 136.0, 128.4 (2C), 127.5 (2C), 126.5, 123.6, 122.4, 121.1, 51.2, 45.2, 45.1, 38.4. HRMS calculated for C<sub>18</sub>H<sub>20</sub>NO<sub>2</sub><sup>+</sup> [M+H]<sup>+</sup>  $m/z$ : 282.1489, found: 282.1496. The er was determined by HPLC using a chiral Chiralpack IG

column [hexane:*i*-PrOH, 95:5]; flow rate 1.0 mL/min;  $\tau_{\text{major}} = 22.6$  min;  $\tau_{\text{minor}} = 26.0$  min, (er 99:1);  $[\alpha]_{\text{D}}^{20} = -30.4$ ; ( $c = 1.05$ ;  $\text{CHCl}_3$ ).

### Methyl (*R,E*)-5-(4-chlorophenyl)-6-(pyridin-2-yl)hex-2-enoate (**6b**)

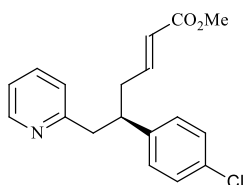

Compound **6b** was obtained according to general procedure from (*E*)-3-(4-chlorophenyl)prop-2-enal **2b** in 79% yield (25.0 mg) after purification by FC (*n*-hexane:ethyl acetate; gradient from 3:1 to 1:1).  $^1\text{H NMR}$  (700 MHz,  $\text{CDCl}_3$ )  $\delta$  8.51 (ddd,  $J = 4.8, 1.8, 0.9$  Hz, 1H), 7.46 (td,  $J = 7.6, 1.9$  Hz, 1H), 7.21 – 7.18 (m, 2H), 7.06 (ddd,  $J = 7.5, 4.9, 1.2$  Hz, 1H), 7.04 – 7.02 (m, 2H), 6.85 (dt,  $J = 7.8, 1.1$  Hz, 1H), 6.77 (dt,  $J = 15.6, 7.3$  Hz, 1H), 5.72 (dt,  $J = 15.6, 1.4$  Hz, 1H), 3.66 (s, 3H), 3.35 (tdd,  $J = 8.5, 6.7, 5.7$  Hz, 1H), 3.11 (dd,  $J = 13.6, 6.9$  Hz, 1H), 2.99 (dd,  $J = 13.6, 8.3$  Hz, 1H), 2.63 – 2.50 (m, 2H).  $^{13}\text{C NMR}$  (176 MHz,  $\text{CDCl}_3$ )  $\delta$  166.7, 159.5, 149.5, 146.6, 141.9, 136.3, 132.3, 129.0 (2C), 128.7 (2C), 123.8, 122.9, 121.5, 51.5, 45.1, 44.8, 38.5. HRMS calculated for  $\text{C}_{18}\text{H}_{19}\text{ClNO}_2^+$  [M+H] $^+$   $m/z$ : 316.1099, found: 316.1104. The er was determined by UPC<sup>2</sup> using a chiral Chiralpack IA gradient from 100%  $\text{CO}_2$  up to 40%; *i*-PrOH, 2.2 mL/min;  $\tau_{\text{major}} = 2.96$  min,  $\tau_{\text{minor}} = 3.12$  min, (98:2 er);  $[\alpha]_{\text{D}}^{20} = -43.9$ ; ( $c = 0.88$ ;  $\text{CHCl}_3$ ).

### Methyl (*R,E*)-5-(3-chlorophenyl)-6-(pyridin-2-yl)hex-2-enoate (**6c**)

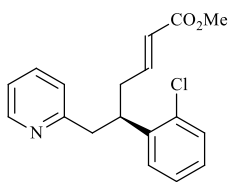

Compound **6c** was obtained according to general procedure from (*E*)-3-(3-chlorophenyl)prop-2-enal **2c** in 73% yield (23.0 mg) after purification by FC (*n*-hexane:ethyl acetate; gradient from 3:1 to 1:1).  $^1\text{H NMR}$  (700 MHz,  $\text{CDCl}_3$ )  $\delta$  8.53 (ddd,  $J = 5.0, 1.9, 0.9$  Hz, 1H), 7.48 (td,  $J = 7.7, 1.9$  Hz, 1H), 7.18 – 7.10 (m, 3H), 7.07 (ddd,  $J = 7.6, 4.8, 1.2$  Hz, 1H), 6.99 (dt,  $J = 7.4, 1.6$  Hz, 1H), 6.87 (dt,  $J = 7.8, 1.2$  Hz, 1H), 6.78 (dt,  $J = 15.6, 7.3$  Hz, 1H), 5.74 (dt,  $J = 15.5, 1.4$  Hz, 1H), 3.67 (s, 3H), 3.35 (tt,  $J = 8.2, 6.3$  Hz, 1H), 3.11 (dd,  $J = 13.6, 7.0$  Hz, 1H), 3.01 (dd,  $J = 13.6, 8.0$  Hz, 1H), 2.63 – 2.53 (m, 2H).  $^{13}\text{C NMR}$  (176 MHz,  $\text{CDCl}_3$ )  $\delta$  166.8, 159.4, 149.6, 146.5, 145.6, 136.3, 134.4, 129.9, 127.8, 126.9, 126.1, 123.9, 123.0, 121.5, 51.5, 45.1, 45.1, 38.4. HRMS calculated for  $\text{C}_{18}\text{H}_{19}\text{ClNO}_2^+$  [M+H] $^+$   $m/z$ : 316.1099, found: 316.11014. The er was determined by HPLC using a chiral Chiralpack IC column

[hexane:*i*-PrOH, 80:20]; flow rate 1.0 mL/min;  $\tau_{\text{major}} = 9.2$  min;  $\tau_{\text{minor}} = 8.5$  min, (er 97.5:2.5);  $[\alpha]_{\text{D}}^{20} = -49.0$ ; ( $c = 0.45$ ; CH<sub>3</sub>OH).

### Methyl (*R,E*)-5-(4-nitrophenyl)-6-(pyridin-2-yl)hex-2-enoate (**6d**)

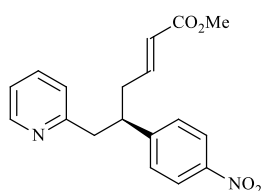

Compound **6d** was obtained according to general procedure from (*E*)-3-(4-nitrophenyl)prop-2-enal **2d** in 91% yield (30.0 mg) after purification by FC (*n*-hexane:ethyl acetate; gradient from 3:1 to 1:1). <sup>1</sup>H NMR (700 MHz, CDCl<sub>3</sub>)  $\delta$  8.50 (ddd,  $J = 4.9, 1.9, 0.9$  Hz, 1H), 8.14 – 8.06 (m, 2H), 7.47 (td,  $J = 7.6, 1.9$  Hz, 1H), 7.33 – 7.24 (m, 2H), 7.07 (ddd,  $J = 7.5, 4.9, 1.1$  Hz, 1H), 6.87 (dt,  $J = 7.8, 1.1$  Hz, 1H), 6.76 (dt,  $J = 15.4, 7.3$  Hz, 1H), 5.74 (dt,  $J = 15.6, 1.5$  Hz, 1H), 3.66 (d,  $J = 0.7$  Hz, 3H), 3.55 (ddd,  $J = 8.6, 6.3, 2.4$  Hz, 1H), 3.19 (dd,  $J = 13.8, 6.8$  Hz, 1H), 3.03 (dd,  $J = 13.8, 8.5$  Hz, 1H), 2.71 – 2.53 (m, 2H). <sup>13</sup>C NMR (176 MHz, CDCl<sub>3</sub>)  $\delta$  166.5, 158.7, 151.2, 149.6, 146.9, 145.7, 136.5, 128.6 (2C), 123.9 (2C), 123.8, 123.4, 121.7, 51.6, 45.2, 44.7, 38.2. HRMS calculated for C<sub>18</sub>H<sub>19</sub>N<sub>2</sub>O<sub>4</sub><sup>+</sup> [M+H]<sup>+</sup>  $m/z$ : 327.1339, found: 327.1339. The er was determined by UPC<sup>2</sup> using a chiral Chiralpack IA gradient from 100% CO<sub>2</sub> up to 40%; *i*-PrOH, 2.2 mL/min  $\tau_{\text{major}} = 3.33$  min;  $\tau_{\text{minor}} = 3.63$  min, (97:3 er);  $[\alpha]_{\text{D}}^{20} = -38.8$ ; ( $c = 1.00$ ; CHCl<sub>3</sub>).

### Methyl (*R,E*)-5-(4-methoxyphenyl)-6-(pyridin-2-yl)hex-2-enoate (**6e**)

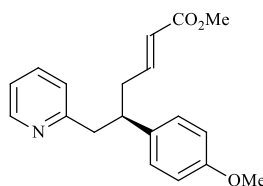

Compound **6e** was obtained according to general procedure from (*E*)-3-(4-methoxyphenyl)prop-2-enal **2e** in 69% yield (21.5 mg) after purification by FC (*n*-hexane:ethyl acetate; gradient from 3:1 to 1:1). <sup>1</sup>H NMR (700 MHz, CDCl<sub>3</sub>)  $\delta$  8.54 – 8.49 (m, 1H), 7.46 (td,  $J = 7.6, 1.9$  Hz, 1H), 7.05 (ddd,  $J = 7.5, 5.0, 1.3$  Hz, 1H), 7.04 – 7.00 (m, 2H), 6.86 (d,  $J = 7.8$  Hz, 1H), 6.83 – 6.76 (m, 3H), 5.72 (dt,  $J = 15.6, 1.4$  Hz, 1H), 3.76 (s, 3H), 3.66 (s, 3H), 3.29 (ddd,  $J = 14.8, 8.2, 6.5$  Hz, 1H), 3.10 (dd,  $J = 13.5, 7.1$  Hz, 1H), 3.01 (dd,  $J = 13.5, 8.2$  Hz, 1H), 2.59 – 2.51 (m, 2H). <sup>13</sup>C NMR (176 MHz, CDCl<sub>3</sub>)  $\delta$  166.9, 160.0, 158.3, 149.4, 147.4, 136.2, 135.4, 128.6 (2C), 123.9, 122.6, 121.3, 114.0 (2C), 55.3, 51.4, 45.5, 44.7, 38.8. HRMS calculated for C<sub>19</sub>H<sub>22</sub>NO<sub>3</sub><sup>+</sup> [M+H]<sup>+</sup>  $m/z$ : 312.1594, found: 312.1600. The er

was determined by UPC<sup>2</sup> using a chiral Chiralpack IA gradient from 100% CO<sub>2</sub> up to 40%; *i*-PrOH, 2.2 mL/min;  $\tau_{\text{major}} = 2.98$  min,  $\tau_{\text{minor}} = 3.08$  min, (97:3 er);  $[\alpha]_{\text{D}}^{20} = -43.9$ ; ( $c = 0.70$ ; CHCl<sub>3</sub>).

### Methyl (*R,E*)-5-(2-methoxyphenyl)-6-(pyridin-2-yl)hex-2-enoate (**6f**)

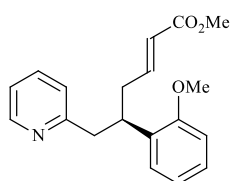

Compound **6f** was obtained according to general procedure from (*E*)-3-(2-methoxyphenyl)prop-2-enal **2f** in 65% yield (20.3 mg) after purification by FC (*n*-hexane:ethyl acetate; gradient from 3:1 to 1:1). <sup>1</sup>H NMR (700 MHz, CDCl<sub>3</sub>)  $\delta$  8.53 – 8.48 (m, 1H), 7.46 (td,  $J = 7.6, 1.8$  Hz, 1H), 7.14 (ddd,  $J = 8.1, 7.3, 1.7$  Hz, 1H), 7.10 (dd,  $J = 7.5, 1.7$  Hz, 1H), 7.04 (ddd,  $J = 7.5, 4.8, 1.2$  Hz, 1H), 6.93 (dt,  $J = 7.7, 1.1$  Hz, 1H), 6.86 (td,  $J = 7.5, 1.1$  Hz, 1H), 6.84 – 6.79 (m, 2H), 5.71 (dt,  $J = 15.6, 1.5$  Hz, 1H), 3.79 – 3.75 (m, 1H), 3.75 (s, 3H), 3.64 (s, 3H), 3.11 (dd,  $J = 7.6, 5.2$  Hz, 2H), 2.64 – 2.54 (m, 2H). <sup>13</sup>C NMR (176 MHz, CDCl<sub>3</sub>)  $\delta$  167.0, 160.5, 157.4, 149.2, 148.0, 136.0, 131.5, 128.1, 127.5, 123.6, 122.0, 121.2, 120.7, 110.8, 55.4, 51.4, 43.5, 38.8, 37.2. HRMS calculated for C<sub>19</sub>H<sub>22</sub>NO<sub>3</sub><sup>+</sup> [M+H]<sup>+</sup>  $m/z$ : 312.1594, found: 312.1604. The er was determined by UPC<sup>2</sup> using a chiral Chiralpack IB gradient from 100% CO<sub>2</sub> up to 40%; *i*-PrOH, 2.2 mL/min;  $\tau_{\text{major}} = 2.87$  min,  $\tau_{\text{minor}} = 3.02$  min, (97.5:2.5 er);  $[\alpha]_{\text{D}}^{20} = -30.6$ ; ( $c = 1.00$ ; CHCl<sub>3</sub>).

### Methyl (*R,E*)-5-(furan-2-yl)-6-(pyridin-2-yl)hex-2-enoate (**6g**)

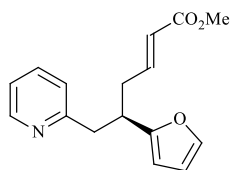

Compound **6g** was obtained according to general procedure from (*E*)-3-(furan-2-yl)prop-2-enal **2g** in 85% yield (23.1 mg) after purification by FC (*n*-hexane:ethyl acetate; gradient from 3:1 to 1:1). <sup>1</sup>H NMR (700 MHz, CDCl<sub>3</sub>)  $\delta$  8.54 – 8.51 (m, 1H), 7.51 (td,  $J = 7.6, 1.8$  Hz, 1H), 7.31 (dd,  $J = 1.9, 0.8$  Hz, 1H), 7.09 (ddd,  $J = 7.5, 4.9, 1.2$  Hz, 1H), 6.93 (dt,  $J = 7.9, 1.1$  Hz, 1H), 6.86 (dt,  $J = 15.6, 7.3$  Hz, 1H), 6.21 (dd,  $J = 3.1, 1.8$  Hz, 1H), 5.92 – 5.90 (m, 1H), 5.77 (dt,  $J = 15.6, 1.5$  Hz, 1H), 3.69 (s, 3H), 3.49 (qd,  $J = 7.7, 5.8$  Hz, 1H), 3.14 (dd,  $J = 13.6, 8.0$  Hz, 1H), 3.05 (dd,  $J = 13.6, 7.1$  Hz, 1H), 2.61 – 2.52 (m, 2H). <sup>13</sup>C NMR (176 MHz, CDCl<sub>3</sub>)  $\delta$  166.9, 159.5, 156.3, 149.5, 146.7, 141.4, 136.3, 123.7, 122.8, 121.5, 110.1, 106.2, 51.5, 42.4, 38.7, 36.3. HRMS calculated for C<sub>16</sub>H<sub>18</sub>NO<sub>3</sub><sup>+</sup> [M+H]<sup>+</sup>  $m/z$ : 272.1281, found: 272.1284. The er was determined by UPC<sup>2</sup> using a chiral Chiralpack IA gradient

from 100% CO<sub>2</sub> up to 40%; *i*-PrOH, 2.2 mL/min;  $\tau_{\text{major}} = 2.43$  min,  $\tau_{\text{minor}} = 2.53$  min, (97:3 er);  $[\alpha]_{\text{D}}^{20} = -20.6$ ; ( $c = 1.07$ ; CHCl<sub>3</sub>).

### Methyl (*R,E*)-5-(pyridin-2-ylmethyl)oct-2-enoate (**6h**)

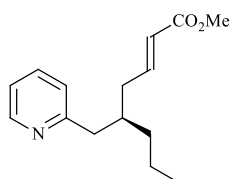

Compound **6h** was obtained according to general procedure from (*E*)-hex-2-enal **2h** in 47% yield (9.2 mg) after purification by FC (*n*-hexane:ethyl acetate; gradient from 3:1 to 1:1). <sup>1</sup>H NMR (700 MHz, CDCl<sub>3</sub>)  $\delta$  8.56 – 8.52 (m, 1H), 7.57 (td,  $J = 7.6, 1.9$  Hz, 1H), 7.12 – 7.08 (m, 2H), 6.94 (dt,  $J = 15.6, 7.4$  Hz, 1H), 5.80 (dt,  $J = 15.6, 1.4$  Hz, 1H), 3.72 (s, 3H), 2.78 (dd,  $J = 13.6, 6.5$  Hz, 1H), 2.68 (dd,  $J = 13.6, 7.6$  Hz, 1H), 2.25 – 2.09 (m, 3H), 1.42 – 1.23 (m, 4H), 0.90 – 0.84 (m, 3H). <sup>13</sup>C NMR (176 MHz, CDCl<sub>3</sub>)  $\delta$  167.0, 161.0, 149.5, 148.1, 136.3, 123.8, 122.6, 121.2, 51.5, 42.9, 38.1, 36.3, 35.9, 20.0, 14.4. HRMS calculated for C<sub>15</sub>H<sub>22</sub>NO<sub>2</sub><sup>+</sup> [M+H]<sup>+</sup>  $m/z$ : 248.1645, found: 248.1637. The er was determined by HPLC using a chiral Chiralpack IC column [hexane:*i*-PrOH, 80:20]; flow rate 1.0 mL/min;  $\tau_{\text{major}} = 7.7$  min;  $\tau_{\text{minor}} = 7.3$  min, (er 96:4);  $[\alpha]_{\text{D}}^{20} = 14.4$ ; ( $c = 0.36$ ; CH<sub>3</sub>OH).

### Methyl (*R,E*)-6-(benzyloxy)-5-(pyridin-2-ylmethyl)hex-2-enoate (**6i**)

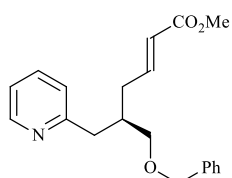

Compound **6i** was obtained according to general procedure from (*E*)-4-(benzyloxy)but-2-enal **2i** in 85% yield (24.5 mg) after purification by FC (*n*-hexane:ethyl acetate; gradient from 3:1 to 1:1). <sup>1</sup>H NMR (700 MHz, CDCl<sub>3</sub>)  $\delta$  8.53 (dt,  $J = 4.3, 1.7$  Hz, 1H), 7.55 (td,  $J = 7.6, 1.9$  Hz, 1H), 7.35 – 7.27 (m, 5H), 7.12 – 7.08 (m, 2H), 6.95 (dt,  $J = 15.6, 7.4$  Hz, 1H), 5.82 (dt,  $J = 15.6, 1.3$  Hz, 1H), 4.46 (d,  $J = 2.4$  Hz, 2H), 3.71 (s, 3H), 3.40 (dd,  $J = 9.3, 4.6$  Hz, 1H), 3.34 (dd,  $J = 9.3, 5.3$  Hz, 1H), 2.89 (dd,  $J = 13.7, 7.2$  Hz, 1H), 2.78 (dd,  $J = 13.7, 6.8$  Hz, 1H), 2.45 – 2.36 (m, 2H), 2.32 – 2.28 (m, 1H). <sup>13</sup>C NMR (176 MHz, CDCl<sub>3</sub>)  $\delta$  167.0, 160.4, 149.5, 147.7, 138.6, 136.3, 128.5 (2C), 127.7 (2C), 127.7, 123.9, 122.7, 121.3, 73.2, 71.8, 51.5, 40.1, 39.0, 34.3. HRMS calculated for C<sub>20</sub>H<sub>24</sub>NO<sub>3</sub><sup>+</sup> [M+H]<sup>+</sup>  $m/z$ : 326.1751, found: 326.1754. The er was determined by HPLC using a chiral Chiralpack IC column [hexane:*i*-PrOH, 95:5]; flow rate 1.0 mL/min;  $\tau_{\text{major}} = 26.8$  min;  $\tau_{\text{minor}} = 28.3$  min, (er = 95:5);  $[\alpha]_{\text{D}}^{20} = -5.7$ ; ( $c = 0.65$ ; CHCl<sub>3</sub>).

## Synthesis of methyl (*R,E*)-5-phenyl-6-(pyridin-4-yl)hex-2-enoate (**6j**)

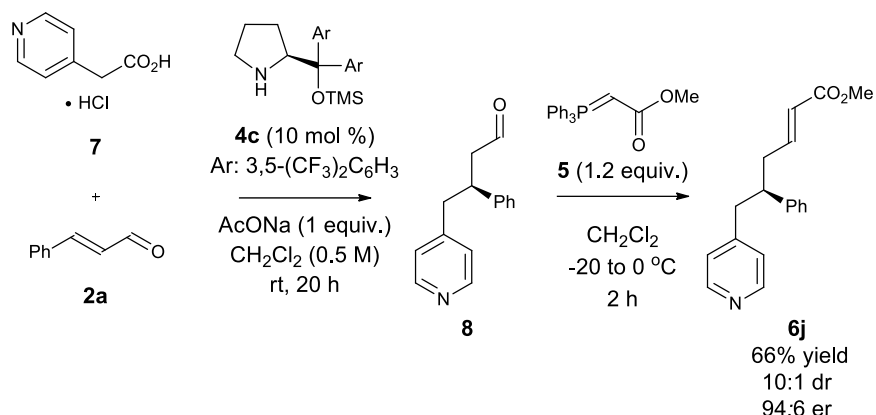

In an ordinary 4 mL glass vial equipped with a magnetic stirring bar, 4-pyridylacetic acid hydrochloride **7** (17.3 mg; 0.1 mmol), cinnamaldehyde **2a** (13.2 mg; 0.1 mmol) and catalyst **4c** (6.0 mg, 0.01 mmol) were placed. Subsequently, dichloromethane (0.2 mL) and sodium acetate (8.2 mg, 0.1 mmol) were added. After 72 hours, the reaction mixture was diluted with dichloromethane (1 mL) and cooled to -20 °C. Then (methoxycarbonylmethylene)triphenylphosphorane **5** (40 mg; 0.12 mmol) was added to the vial and stirred at 0 °C for 2 hours. Subsequently, the solvent was removed under reduced pressure and the obtained residue was directly subjected to flash chromatography on silica gel to afford pure products. Pure product was isolated by FC (*n*-hexane:ethyl acetate; gradient from 3:1 to 1:1) to give **6i** in 66% yield (18.6 mg). <sup>1</sup>H NMR (700 MHz, CDCl<sub>3</sub>) δ 8.54 – 8.22 (m, 2H), 7.29 – 7.23 (m, 2H), 7.21 – 7.17 (m, 1H), 7.07 – 7.04 (m, 2H), 6.91 – 6.88 (m, 2H), 6.82 (dt, *J* = 15.6, 7.3 Hz, 1H), 5.78 (dt, *J* = 15.6, 1.5 Hz, 1H), 3.68 (s, 3H), 3.09 – 2.99 (m, 1H), 2.95 (dd, *J* = 13.6, 6.3 Hz, 1H), 2.87 (dd, *J* = 13.6, 8.7 Hz, 1H), 2.63 – 2.49 (m, 2H). <sup>13</sup>C NMR (176 MHz, CDCl<sub>3</sub>) δ 166.6, 149.5 (2C), 148.7, 146.4 (2C), 142.3, 128.6 (2C), 127.5 (2C), 126.9, 124.5, 122.9, 51.4, 46.2, 42.0, 38.5. HRMS calculated for C<sub>18</sub>H<sub>20</sub>NO<sub>2</sub><sup>+</sup> [M+H]<sup>+</sup> *m/z*: 282.1489, found: 282.1495. The er was determined by HPLC using a chiral Chiralpack IC column [hexane:*i*-PrOH, 98:2]; flow rate 1.0 mL/min; τ<sub>major</sub> = 17.3 min, τ<sub>minor</sub> = 16.2 min, (94:6 er); [α]<sub>D</sub><sup>20</sup> = -21.9; (*c* = 0.34; CHCl<sub>3</sub>).



## Synthesis of methyl (*R,E*)-5-phenyl-6-(quinolin-2-yl)hex-2-enoate (**6k**)

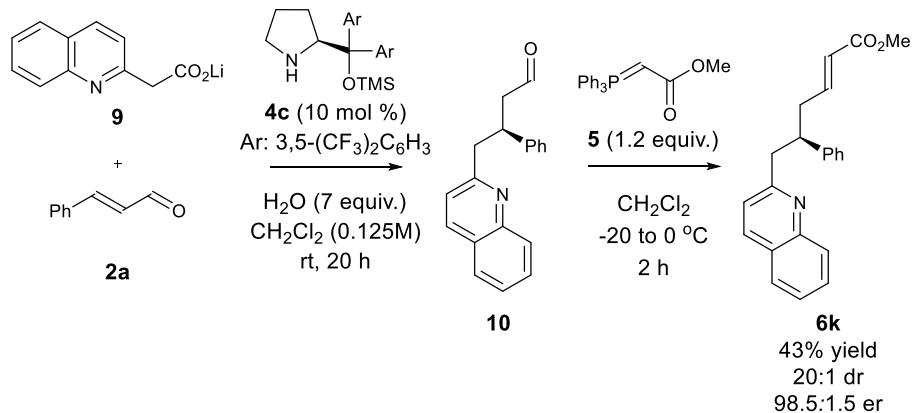

In an ordinary 4 mL glass vial equipped with a magnetic stirring bar, lithium 2-(quinolin-2-yl)acetate **9** (38.0 mg; 0.2 mmol), cinnamaldehyde **2a** (13.2 mg; 0.1 mmol) and catalyst **4c** (6.0 mg; 0.01 mmol) were placed. Then dichloromethane (0.8 mL) and H<sub>2</sub>O (13 μL; 0.7 mmol) were added. The reaction mixture was stirred for 20 hours at room temperature. After full conversion of the starting material **2a**, the reaction mixture was diluted with dichloromethane (1 mL) and cooled to -20 °C. Then (methoxycarbonylmethylene)triphenylphosphorane **5** (40 mg; 0.12 mmol) was added to the vial and stirred at 0 °C for 2 hours. Subsequently, the solvent was removed under reduced pressure and the obtained residue was directly subjected to flash chromatography on silica gel (*n*-hexane:ethyl acetate; gradient from 5:1 to 3:1) to afford pure product **6k** in 43% yield (14.3 mg). <sup>1</sup>H NMR (700 MHz, CDCl<sub>3</sub>) δ 8.07 – 8.01 (m, 2H), 7.94-7.93 (d, *J* = 8.4 Hz, 1H), 7.74 – 7.72 (m, 1H), 7.70 – 7.67 (m, 1H), 7.49 – 7.48 (m, 2H), 7.25 – 7.23 (m, 1H), 7.19 – 7.16 (m, 2H), 7.01 (d, *J* = 8.4 Hz, 1H), 6.81 (dt, *J* = 15.7, 7.3 Hz, 1H), 5.73 (dt, *J* = 15.6, 1.4 Hz, 1H), 3.63 (s, 3H), 3.51 – 3.42 (m, 1H), 3.37 – 3.21 (m, 2H), 2.70 – 2.59 (m, 2H). <sup>13</sup>C NMR (176 MHz, CDCl<sub>3</sub>) δ 166.7, 160.3, 147.9, 147.0, 143.2, 135.9, 129.3, 128.9, 128.5 (2C), 127.6 (2C), 127.5, 126.7, 126.6, 125.8, 122.5, 121.9, 51.3, 45.8, 45.3, 38.6. HRMS calculated for C<sub>22</sub>H<sub>22</sub>NO<sub>2</sub><sup>+</sup> [M+H]<sup>+</sup> *m/z*: 332.1645, found: 332.1643. The er was determined by HPLC using a chiral Chiralpack IA column [hexane:*i*-PrOH, 95:5]; flow rate 1.0 mL/min; τ<sub>major</sub> = 10.8 min, τ<sub>minor</sub> = 11.8 min, (98.5:1.5 er); [α]<sub>D</sub><sup>20</sup> = -86.2; (*c* = 0.77; CHCl<sub>3</sub>).

**Synthesis of methyl (*R,E*)-6-(benzo[*d*]oxazol-2-yl)-5-phenylhex-2-enoate (**6l**) and methyl (*R,E*)-6-(benzo[*d*]thiazol-2-yl)-5-phenylhex-2-enoate (**6m**)**

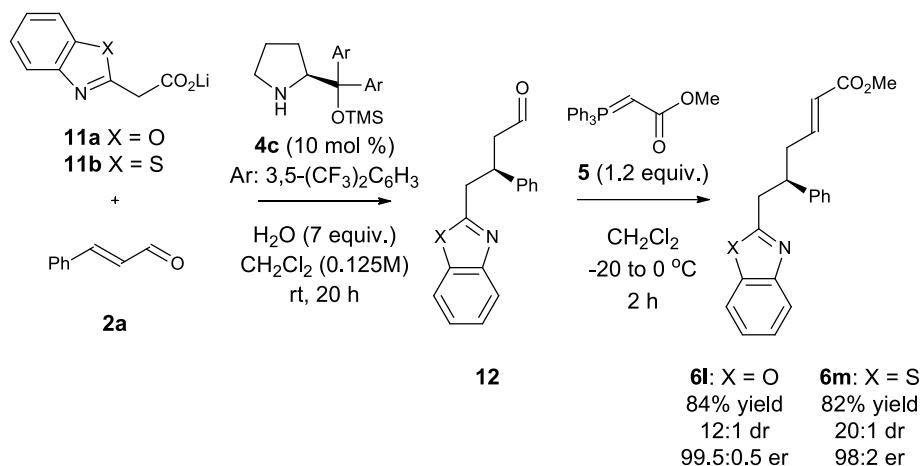

In an ordinary 4 mL glass vial equipped with a magnetic stirring bar, lithium 2-(benzo[*d*]oxazol-2-yl)acetate **11a** (73.2 mg; 0.4 mmol) or lithium 2-(benzo[*d*]thiazol-2-yl)acetate **11b** (79.7 mg; 0.4 mmol), cinnamaldehyde **2a** (13.2 mg; 0.1 mmol) and catalyst **6c** (6.0 mg; 0.01 mmol) were placed. Then dichloromethane (0.8 mL) and H<sub>2</sub>O (13 μL; 0.7 mmol) were subsequently added. The reaction mixture was stirred for 20 hours at room temperature. After full conversion of the starting material **2a**, the reaction mixture was diluted with dichloromethane (1 mL) and cooled to -20 °C. Then (methoxycarbonylmethylene)triphenylphosphorane **5** (40 mg; 0.12 mmol) was added to the vial and stirred at 0 °C for 2 hours. Subsequently, the solvent was removed under reduced pressure and the obtained residue was directly subjected to flash chromatography on silica gel (*n*-hexane:ethyl acetate; gradient from 5:1 to 3:1) to give to afford pure products.

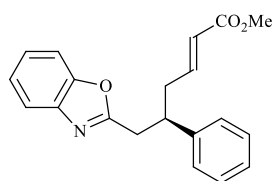

**Methyl (*R,E*)-6-(benzo[*d*]oxazol-2-yl)-5-phenylhex-2-enoate (**6l**)** was obtained in 84% yield (27 mg). <sup>1</sup>H NMR (700 MHz, Chloroform-*d*) δ 8.52 (ddd, *J* = 4.9, 1.8, 0.9 Hz, 1H), 7.45 (td, *J* = 7.6, 1.8 Hz, 1H), 7.26 – 7.21 (m, 2H), 7.16 (ddt, *J* = 7.9, 6.8, 1.3 Hz, 1H), 7.13 – 7.10 (m, 2H), 7.06 (ddd, *J* = 7.5, 4.9, 1.2 Hz, 1H), 6.86 (dt, *J* = 7.8, 1.1 Hz, 1H), 6.81 (dt, *J* = 15.6, 7.3 Hz, 1H), 5.73 (dt, *J* = 15.6, 1.5 Hz, 1H), 3.65 (s, 3H), 3.34 (p, *J* = 7.4 Hz, 1H), 3.13 (dd, *J* = 13.6, 7.2 Hz, 1H), 3.05 (dd, *J* = 13.6, 8.1 Hz, 1H), 2.59 (td, *J* = 7.3, 1.5 Hz, 2H). <sup>13</sup>C NMR (176 MHz, CDCl<sub>3</sub>) δ 166.5, 164.9, 150.7, 145.9, 142.2, 141.2, 128.8 (2C), 127.2 (2C), 127.1, 124.6, 124.2, 123.0, 119.7, 110.3, 51.4, 43.0, 38.4,

35.4. HRMS calculated for  $C_{20}H_{20}NO_2^+$   $[M+H]^+$   $m/z$ : 322.1438, found: 322.1437. The er was determined by UPC<sup>2</sup> using a chiral Chiralpack IA gradient from 100% CO<sub>2</sub> up to 40%; *i*-PrOH, 2.2 mL/min;  $\tau_{major}$  = 2.86 min,  $\tau_{minor}$  = 3.06 min, (99.5:0.5 er);  $[\alpha]_D^{20}$  = -45.8; (*c* = 0.67; CHCl<sub>3</sub>).

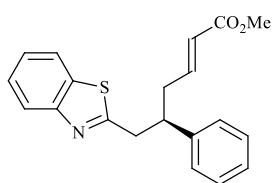

**Methyl (*R,E*)-6-(benzo[*d*]thiazol-2-yl)-5-phenylhex-2-enoate (6m)** was obtained followed in 82% yield (27.7 mg). <sup>1</sup>H NMR (700 MHz, CDCl<sub>3</sub>)  $\delta$  7.99 – 7.98 (m, 1H), 7.79 – 7.78 (m, 1H), 7.47 – 7.45 (m 1H), 7.37 – 7.35 (m, 1H), 7.34 – 7.25 (m, 2H), 7.24 – 7.20 (m, 3H), 6.82 (dt, *J* = 15.6, 7.3 Hz, 1H), 5.77 (dt, *J* = 15.6, 1.5 Hz, 1H), 3.65 (s, 3H), 3.51 – 3.36 (m, 3H), 2.73 – 2.61 (m, 2H). <sup>13</sup>C NMR (176 MHz, CDCl<sub>3</sub>)  $\delta$  169.3, 166.6, 153.1, 146.1, 142.2, 135.2, 128.8 (2C), 127.5 (2C), 127.1, 125.9, 124.8, 123.0, 122.7, 121.5, 51.4, 45.3, 40.7, 38.6. HRMS calculated for  $C_{20}H_{20}NO_2S^+$   $[M+H]^+$   $m/z$ : 338.1209, found: 338.1212. The er was determined by UPC<sup>2</sup> using a chiral Chiralpack IA gradient from 100% CO<sub>2</sub> up to 40%; *i*-PrOH, 2.2 mL/min;  $\tau_{major}$  = 3.33 min,  $\tau_{minor}$  = 3.45 min, (98:2 er);  $[\alpha]_D^{20}$  = -43.1; (*c* = 0.45; CHCl<sub>3</sub>).

### 3. Crystal and X-ray data for 6a

The single crystal X-ray diffraction study at 100 K revealed that compound **6a** (C<sub>18</sub>H<sub>19</sub>NO<sub>2</sub>) crystallizes in the non-centrosymmetric orthorhombic space group  $P2_12_12_1$  ( $Z = 4$ ) and the crystal structure consists of one crystallographically independent formula unit in the unit cell (Figure 1).

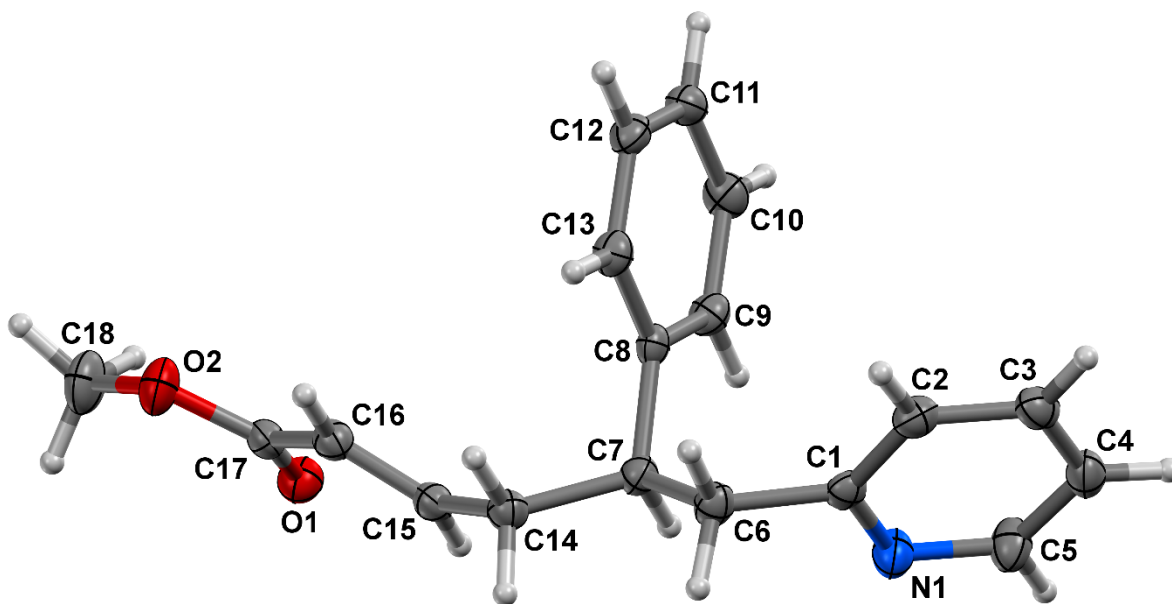

Figure 1. The molecular structure of the compound **6a** at 100 K, showing 50% probability displacement ellipsoids. Hydrogen atoms are drawn with an arbitrary radius.

Single crystal X-ray diffraction data were collected at 100 K by the  $\omega$ -scan technique using a RIGAKU XtaLAB Synergy, Dualflex, Pilatus 300K diffractometer with PhotonJet micro-focus X-ray Source Cu-K $\alpha$  ( $\lambda = 1.54184 \text{ \AA}$ ).<sup>3</sup> Data collection, cell refinement, data reduction and absorption correction were performed using CrysAlis PRO software.<sup>3</sup> The crystal structure was solved by using direct methods with the SHELXT 2018/2 program.<sup>4</sup> Atomic scattering factors were taken from the International Tables for X-ray Crystallography. Positional parameters of non-H-atoms were refined by a full-matrix least-squares method on  $F^2$  with anisotropic thermal parameters by

<sup>3</sup> Rigaku OD. CrysAlis PRO. Rigaku Oxford Diffraction Ltd, Yarnton, Oxfordshire, England, 2020.

<sup>4</sup> G.M. Sheldrick, *Acta Cryst.* 2015, **A71**, 3-8.

using the SHELXL 2018/3 program.<sup>5</sup> All hydrogen atoms were found from the difference Fourier maps and for further calculations they were positioned geometrically in calculated positions (C–H = 0.95–1.00 Å) and constrained to ride on their parent atoms with isotropic displacement parameters set to 1.2–1.5 times the  $U_{eq}$  of the parent atom.

**Methyl (*R,E*)-5-phenyl-6-(pyridin-2-yl)hex-2-enoate (6a):** Formula  $C_{18}H_{19}NO_2$ , monoclinic, space group  $P2_12_12_1$ ,  $Z = 4$ , unit cell constants  $a = 5.7216(1)$ ,  $b = 15.4964(1)$ ,  $c = 17.3718(1)$  Å,  $V = 1540.26(3)$  Å<sup>3</sup>. The integration of the data yielded a total of 41794 reflections with  $\theta$  angles in the range of 3.82 to 66.60°, of which 2719 were independent ( $R_{int} = 2.42\%$ ), and 2694 were greater than  $2\sigma(F^2)$ . The final anisotropic full-matrix least-squares refinement on  $F^2$  with 192 parameters converged at  $R_1 = 2.19\%$  and  $wR_2 = 5.41\%$  for all data. The largest peak in the final difference electron density synthesis was  $0.118 e \text{ \AA}^{-3}$  and the largest hole was  $-0.104 e \text{ \AA}^{-3}$ . The goodness-of-fit was 1.067. The absolute configuration was unambiguously determined from anomalous scattering, by calculating the  $x$  Flack parameter of  $-0.04(3)$  using 1105 quotients.<sup>6</sup>

CCDC 2046872 contains the supplementary crystallographic data for this paper. These data can be obtained free of charge from The Cambridge Crystallographic Data Centre via [www.ccdc.cam.ac.uk/structures](http://www.ccdc.cam.ac.uk/structures).

---

<sup>5</sup> G.M. Sheldrick, *Acta Cryst.* 2015, **C71**, 3–8.

<sup>6</sup> S. Parsons, H.D. Flack and T. Wagner, *Acta Cryst.* 2013, **B69**, 249–259.

#### 4. Synthesis of methyl (*R*)-5-phenyl-6-(pyridin-2-yl)hexanoate **13**

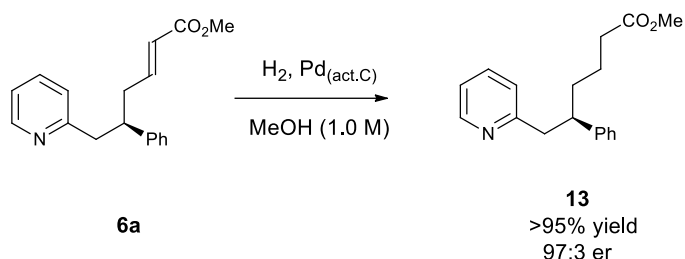

Pd-C (5 mg) was added to a stirred solution of olefin **6a** (28.1 mg, 0.1 mmol) in methanol (3 mL).<sup>7</sup> The resulting mixture was vigorously stirred for 20 h at room temperature under a H<sub>2</sub> atmosphere. The mixture was then filtered through Celite, the filtercake was washed with methanol (5 mL) and the combined filtrates were concentrated in vacuo to give the desired product **13** with 95 % yield (27.3 mg) as a colorless oil. <sup>1</sup>H NMR (700 MHz, CDCl<sub>3</sub>) δ 8.52 – 8.47 (m, 1H), 7.47 – 7.38 (m, 1H), 7.24 – 7.21 (m, 2H), 7.17 – 7.13 (m, 1H), 7.13 – 7.07 (m, 2H), 7.03 (ddd, J = 7.5, 4.9, 1.1 Hz, 1H), 6.83 (dt, J = 7.8, 1.1 Hz, 1H), 3.59 (s, 3H), 3.15 – 3.05 (m, 2H), 3.05 – 2.97 (m, 1H), 2.28 – 2.14 (m, 2H), 1.76 – 1.66 (m, 2H), 1.54 – 1.41 (m, 2H). <sup>13</sup>C NMR (176 MHz, CDCl<sub>3</sub>) δ 173.9, 160.3, 149.2, 144.2, 135.9, 128.3 (2C), 127.6 (2C), 126.2, 123.7, 121.0, 51.4, 46.2, 46.0, 35.2, 34.0, 22.9. HRMS calculated for C<sub>18</sub>H<sub>22</sub>NO<sub>2</sub><sup>+</sup> [M+H]<sup>+</sup> m/z: 284.1645, found: 284.1649. The er was determined by UPC<sup>2</sup> using a chiral Chiralpack IB gradient from 100% CO<sub>2</sub> up to 40%; *i*-PrOH, 2.5 mL/min; τ<sub>major</sub> = 2.69 min, τ<sub>minor</sub> = 2.84 min, (97:3 er); [α]<sub>L</sub><sup>20</sup> = -50.6; (c = 1.00; CHCl<sub>3</sub>).

<sup>7</sup> J. P. Mukherjee, S. Sil, A. K. Pahari and S. K. Chattopadhyay, *Synthesis* 2016, **48**, 1181-1190.

## 5. Synthesis of (*R,E*)-2-(6-methoxy-6-oxo-2-phenylhex-4-en-1-yl)pyridine 1-oxide **14**

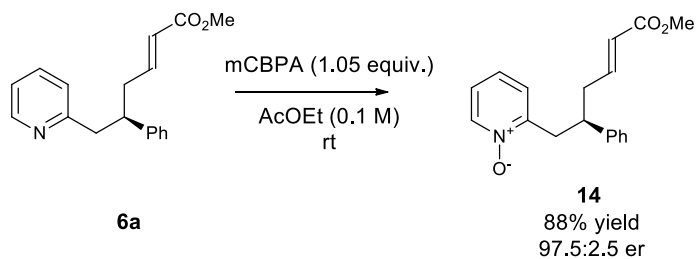

To a stirred solution of olefin **6a** (25.5 mg, 0.1 mmol,) in ethyl acetate (1mL) 77% *m*CBPA (23.4 mg, 0.105 mmol,) was added.<sup>8</sup> After stirring for 20 h in room temperature, reaction mixture was directly subjected to flash chromatography (ethyl acetate: methanol eluent gradient from 98:2 to 90:10 (v/v)) to obtain pure product **14** in 88% yield (26.2 mg) as a yellow oil. <sup>1</sup>H NMR (700 MHz, CDCl<sub>3</sub>) δ 8.30 (d, *J* = 6.4 Hz, 1H), 7.21 – 7.19 (m, 2H), 7.14 – 7.12 (m, 1H), 7.09 – 7.05 (m, 3H), 7.03 – 6.95 (m, 1H), 6.82 (dt, *J* = 14.9, 7.1 Hz, 1H), 6.79 – 6.73 (m, 1H), 5.80 (d, *J* = 15.6 Hz, 1H), 3.63 (s, 3H), 3.53 – 3.46 (m, 2H), 2.97 (dd, *J* = 13.7, 9.6 Hz, 1H), 2.63 (t, *J* = 7.3 Hz, 2H). <sup>13</sup>C NMR (176 MHz, CDCl<sub>3</sub>) δ 166.80, 150.4, 146.5, 142.6, 139.9, 128.7 (2C), 127.5 (2C), 127.0, 126.9, 126.1, 123.9, 122.8, 51.4, 41.3, 39.0, 38.0. HRMS calculated for C<sub>18</sub>H<sub>20</sub>NO<sub>3</sub><sup>+</sup>[M+H]<sup>+</sup> *m/z*: 298.1438, found: 298.1442. The er was determined by UPC<sup>2</sup> using a chiral Chiralpack IA gradient from 100% CO<sub>2</sub> up to 40%; *i*-PrOH, 2.2 mL/min; τ<sub>major</sub> = 4.27 min, τ<sub>minor</sub> = 4.13 min, (97.5:2.5 er); [α]<sub>D</sub><sup>20</sup> = -100.4; (*c* = 1.00; MeOH).

<sup>8</sup> G. Li, S. Yang, B. Lv, Q. Han, X. Ma, K. Sun, Z. Wang, F. Zhao, Y. Lva and H. Wu, *Org. Biomol. Chem.* 2015, **13**, 11184-11188.

## 6. Synthesis of methyl (S)-3-phenyl-4-(pyridin-2-yl)butanoate **15**

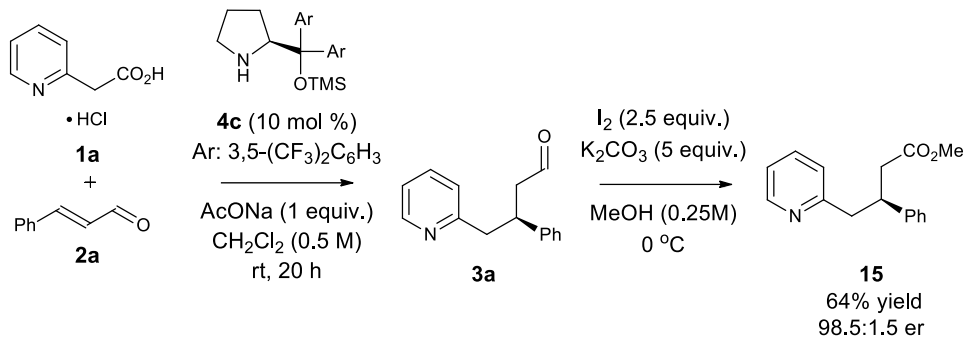

In an ordinary 4 mL glass vial equipped with a magnetic stirring bar, 2-pyridylacetic acid hydrochloride **1a** (17.3 mg; 0.1 mmol),  $\alpha,\beta$ -unsaturated aldehyde **2a** (0.1 mmol) and catalyst **4c** (6.0 mg, 0.01 mmol) were placed. Subsequently, dichloromethane (0.2 mL) and sodium acetate (8.2 mg, 0.1 mmol) were added. After full conversion of starting material **2a** the mixture was cooled to 0 °C and methanol (0.2 mL), K<sub>2</sub>CO<sub>3</sub> (69 mg, 0.5 mmol) were added.<sup>9</sup> After 5 minutes solution of iodine (63 mg, 0.25 mmol,) in methanol (0.4 mL) was added at 0 °C and the reaction mixture was stirred in this temperature for 1 h. Next, the reaction was quenched with saturated solution of Na<sub>2</sub>S<sub>2</sub>O<sub>5</sub> (5 mL) and extracted with ethyl acetate (3 x 5 mL). Combined organic layers were washed with water (5 mL) and brine (5 mL) and dried over anhydrous MgSO<sub>4</sub>, filtered and concentrated under reduced pressure. Crude product was purified by flash chromatography (eluent: *n*-hexane:ethyl acetate 60:40 (v/v)) to yield ester **13** in 64 % yield (16.3 mg) as a yellow oil. <sup>1</sup>H NMR (700 MHz, CDCl<sub>3</sub>)  $\delta$  8.65 – 8.46 (m, 1H), 7.51 – 7.49 (m, 1H), 7.33 – 7.23 (m, 2H), 7.23 – 7.12 (m, 3H), 7.09 – 7.07 (m, 1H), 6.98 – 6.96 (m, 1H), 3.71 (tdd, *J* = 9.0, 7.4, 4.1 Hz, 1H), 3.53 (s, 3H), 3.19 – 3.02 (m, 2H), 2.87 – 2.61 (m, 2H). <sup>13</sup>C NMR (176 MHz, CDCl<sub>3</sub>)  $\delta$  172.6, 159.7, 149.4, 143.4, 136.2, 128.5 (2C), 127.5 (2C), 126.7, 123.8, 121.4, 51.5, 45.1, 42.5, 40.4. HRMS calculated for C<sub>16</sub>H<sub>18</sub>NO<sub>2</sub><sup>+</sup> [M+H]<sup>+</sup> *m/z*: 256.1332, found: 256.1333. The er was determined by HPLC using a chiral Chiralpack IA column [hexane:*i*-PrOH, 98:2]; flow rate 1.0 mL/min;  $\tau_{\text{major}}$  = 17.9 min,  $\tau_{\text{minor}}$  = 19.8 min, (98.5:1.5 er);  $[\alpha]_{\text{D}}^{20}$  = 48.5; (*c* = 1.00; CHCl<sub>3</sub>).

<sup>9</sup> G. L. Bundy, L. S. Banitt, P. J. Dobrowolski, J. R. Palmer, T. M. Schwartz, D. C. Zimmermann, M. F. Lipton, M. A. Mauragis, M. F. Veley, R. B. Appell, R. C. Clouse and E. D. Daug, *Org. Process Res. Dev.* 2001, **5**, 144-151.



## 7. Synthesis of (*R*)-*N*-(3-phenyl-4-(pyridin-2-yl)butyl)aniline **16**

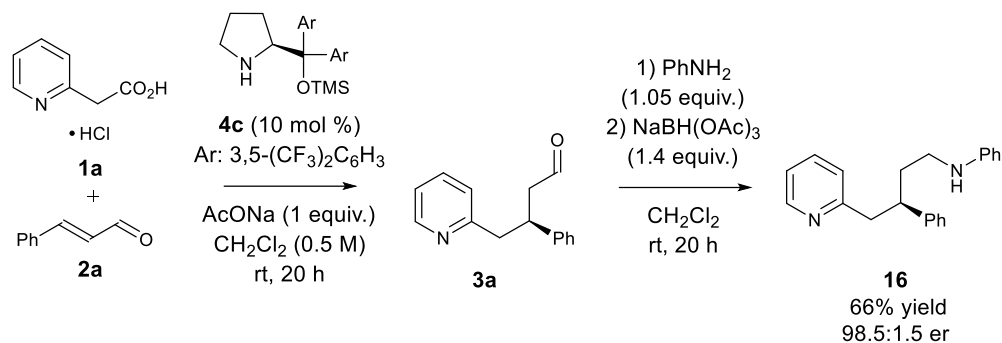

In an ordinary 4 mL glass vial equipped with a magnetic stirring bar, 2-pyridylacetic acid hydrochloride **1a** (17.3 mg; 0.1 mmol),  $\alpha,\beta$ -unsaturated aldehyde **2a** (0.1 mmol) and catalyst **4c** (6.0 mg, 0.01 mmol) were placed. Subsequently, dichloromethane (0.2 mL) and sodium acetate (8.2 mg, 0.1 mmol) were added. After full conversion of starting material **2a** the reaction mixture was diluted with dichloromethane (0.5 mL) and aniline (8.3 mg, 0.105 mmol) was added.<sup>10</sup> After stirring for 5 minutes sodium triacetoxyborohydride (24.9 mg, 0.14 mmol) was added portion-wise to a reaction mixture. After stirring at room temperature for 20 h saturated solution of sodium hydrogen carbonate and dichloromethane were added. The organic layer was separated and washed with brine, dried over MgSO<sub>4</sub>, filtered and concentrated under reduced pressure. The residue was purified by chromatography on silica gel (*n*-hexane/ethyl acetate gradient from 3:1 to 1:1) to give **16** in 66% yield (19.9 mg) as a colorless oil. <sup>1</sup>H NMR (700 MHz, CDCl<sub>3</sub>)  $\delta$  8.54 – 8.53 (m, 1H), 7.46 – 7.45 (m, 1H), 7.31 – 7.23 (m, 2H), 7.20 – 7.12 (m, 3H), 7.12 – 7.03 (m, 3H), 6.87 (dt, *J* = 7.8, 1.0 Hz, 1H), 6.64 (tt, *J* = 7.3, 1.1 Hz, 1H), 6.56 – 6.39 (m, 2H), 3.36 – 3.22 (m, 1H), 3.25 – 3.00 (m, 2H), 3.00 – 2.91 (m, 2H), 2.09 – 1.85 (m, 2H).<sup>13</sup>C NMR (176 MHz, CDCl<sub>3</sub>)  $\delta$  160.2, 149.4, 148.4, 144.2, 136.2, 129.2 (2C), 128.6 (2C), 127.8 (2C), 126.6, 123.9, 121.3, 117.2, 112.8 (2C), 46.0, 44.4, 42.3, 35.5. HRMS calculated for C<sub>21</sub>H<sub>23</sub>N<sub>2</sub><sup>+</sup> [M+H]<sup>+</sup> *m/z*: 303.1856, found: 303.1862. The er was determined by UPC<sup>2</sup> using a chiral Chiralpack IC gradient from 100% CO<sub>2</sub> up to 40%; *i*-PrOH, 2.2 mL/min;  $\tau_{\text{major}}$  = 3.91 min,  $\tau_{\text{minor}}$  = 3.70 min, (98.5:1.5 er);  $[\alpha]_{\text{D}}^{20}$  = -27.9; (*c* = 0.50; CHCl<sub>3</sub>).

<sup>10</sup> R. Tedesco, A. N. Shaw, R. Bambal, D. Chai, N.O. Concha, M.G. Darcy, D. Dhanak, D. M. Fitch, A. Gates, W. G. Gerhardt, D. L. Haleboua, C. Han, G. A. Hofmann, V.K. Johnston, A. C. Kaura, N. Liu, R. M. Keenan, J. Lin-Goerke, R. T. Sarisky, K. J. Wiggall, M. N. Zimmerman and K. J. Duffy, *J. Med. Chem.*, 2006, **49**, 971-983.

## 8. NMR Data

### Methyl (*R,E*)-5-phenyl-6-(pyridin-2-yl)hex-2-enoate (6a)

#### <sup>1</sup>H NMR

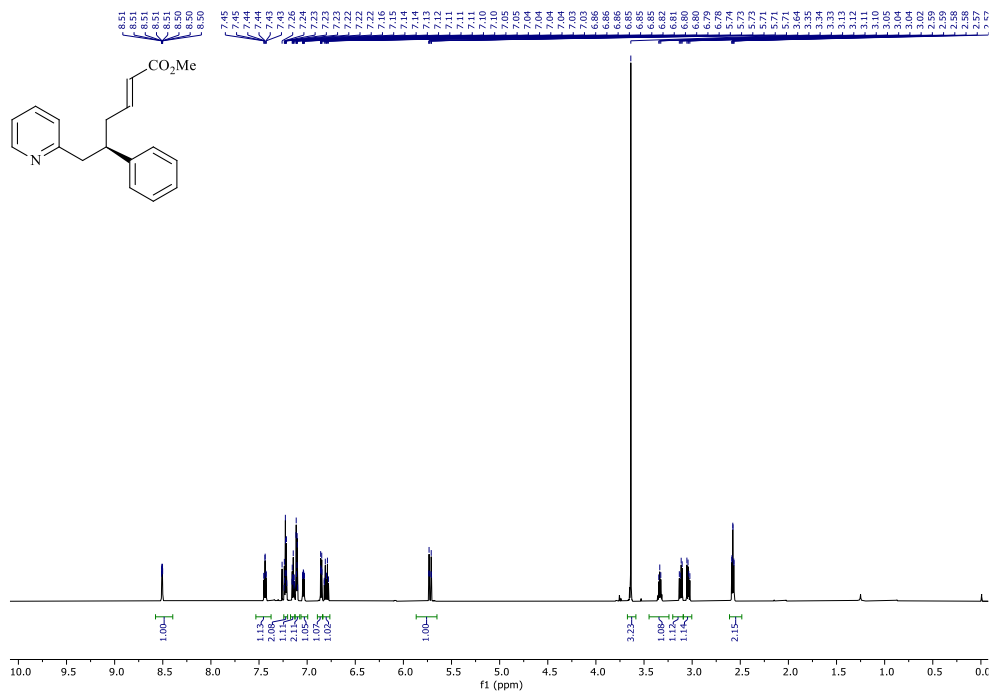

#### <sup>13</sup>C NMR

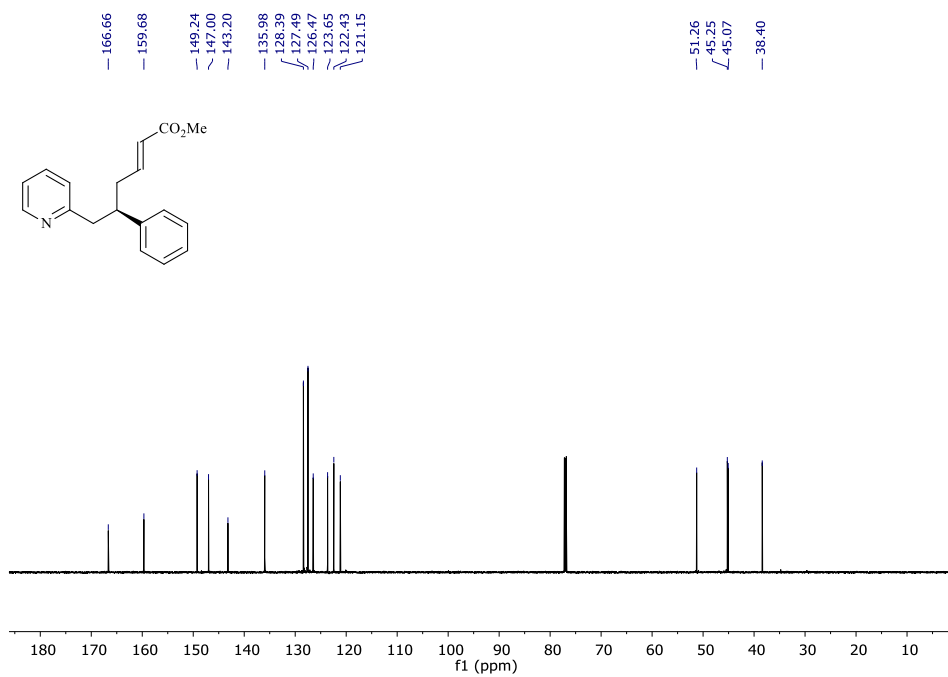



# Methyl (*R,E*)-5-(3-chlorophenyl)-6-(pyridin-2-yl)hex-2-enoate (6c)

## <sup>1</sup>H NMR

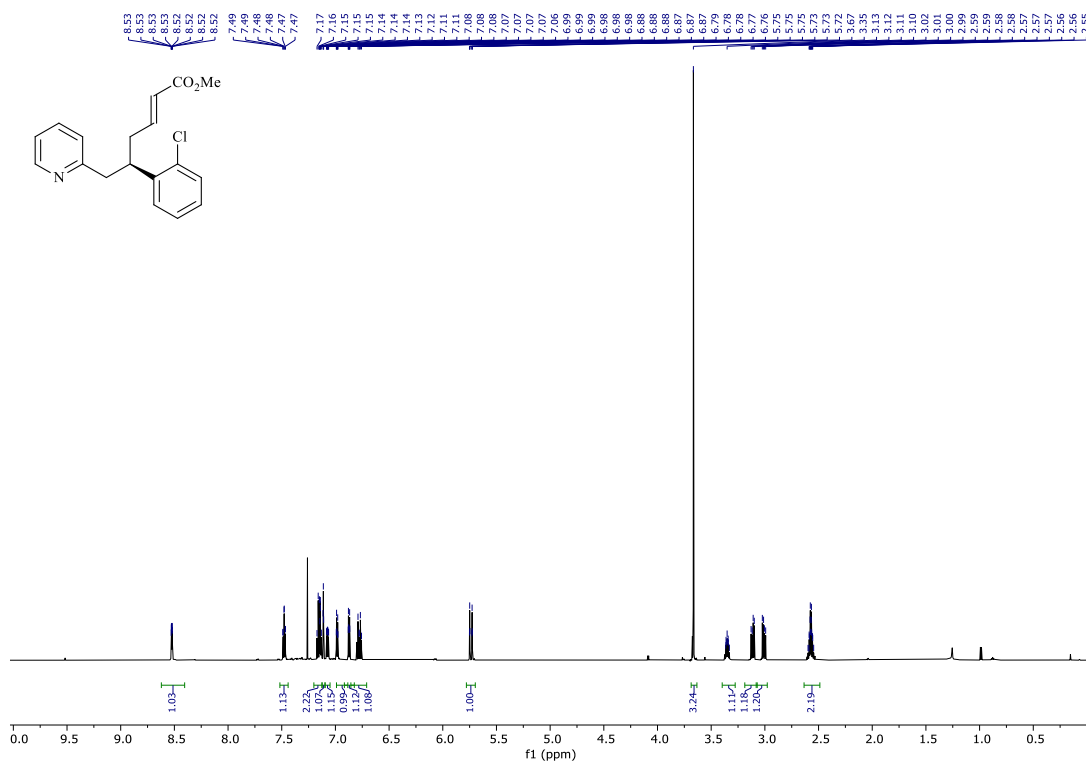

## <sup>13</sup>C NMR

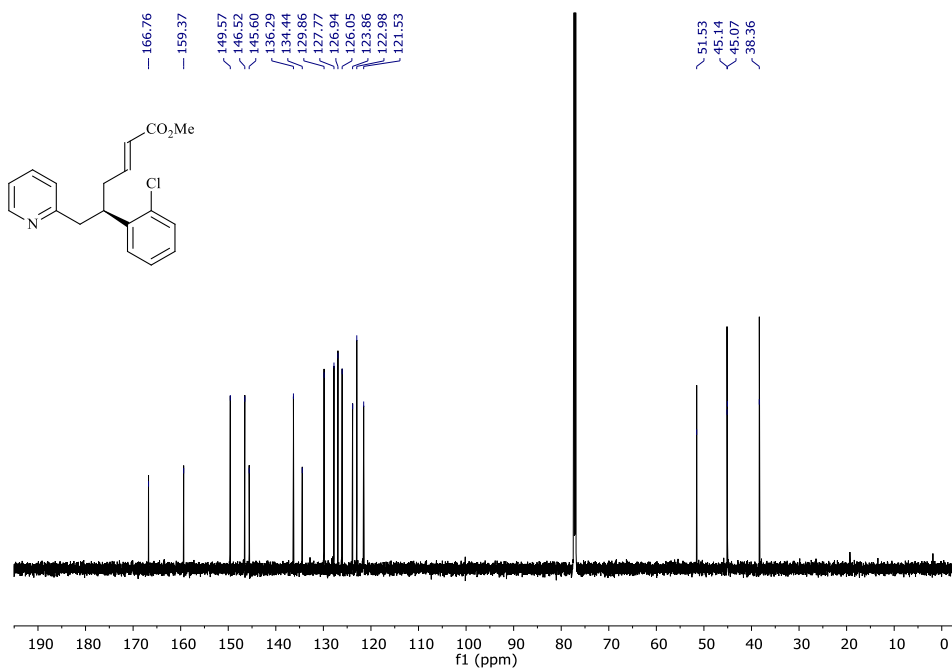

Methyl (*R,E*)-5-(4-nitrophenyl)-6-(pyridin-2-yl)hex-2-enoate (6d)

<sup>1</sup>H NMR

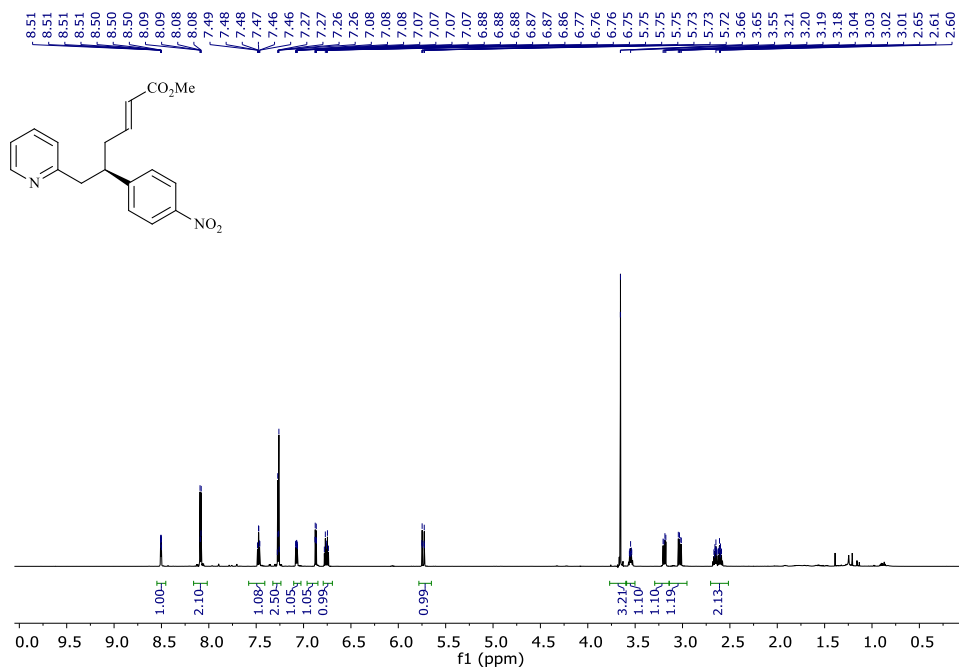

<sup>13</sup>C NMR

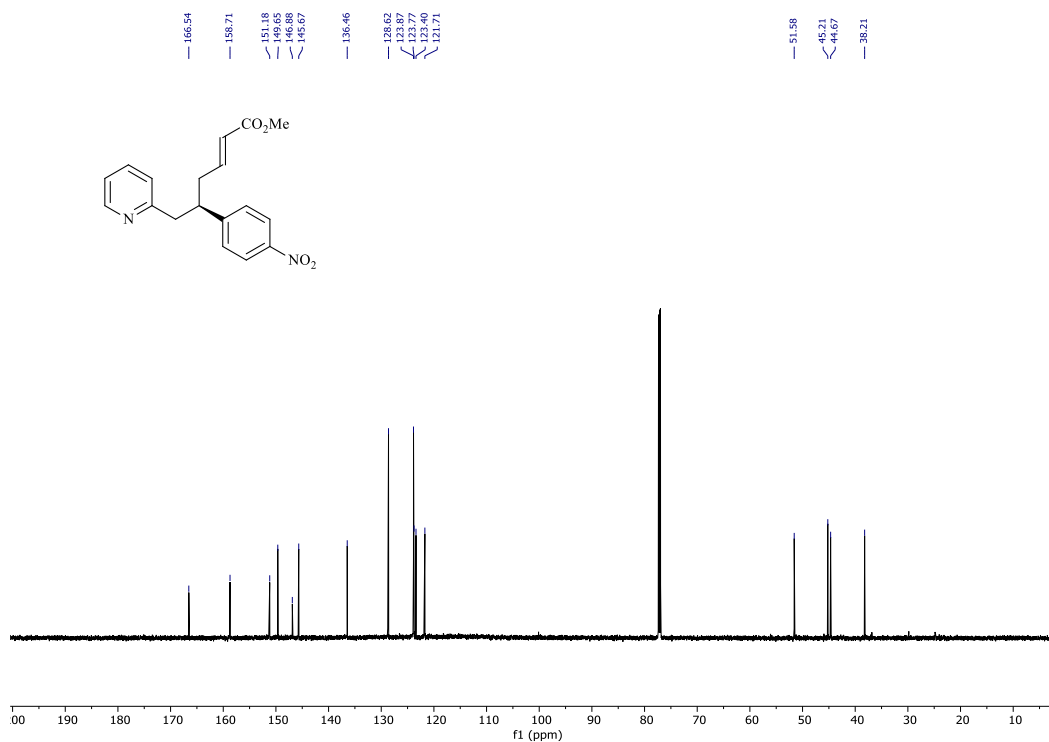

# Methyl (*R,E*)-5-(4-methoxyphenyl)-6-(pyridin-2-yl)hex-2-enoate (6e)

## <sup>1</sup>H NMR

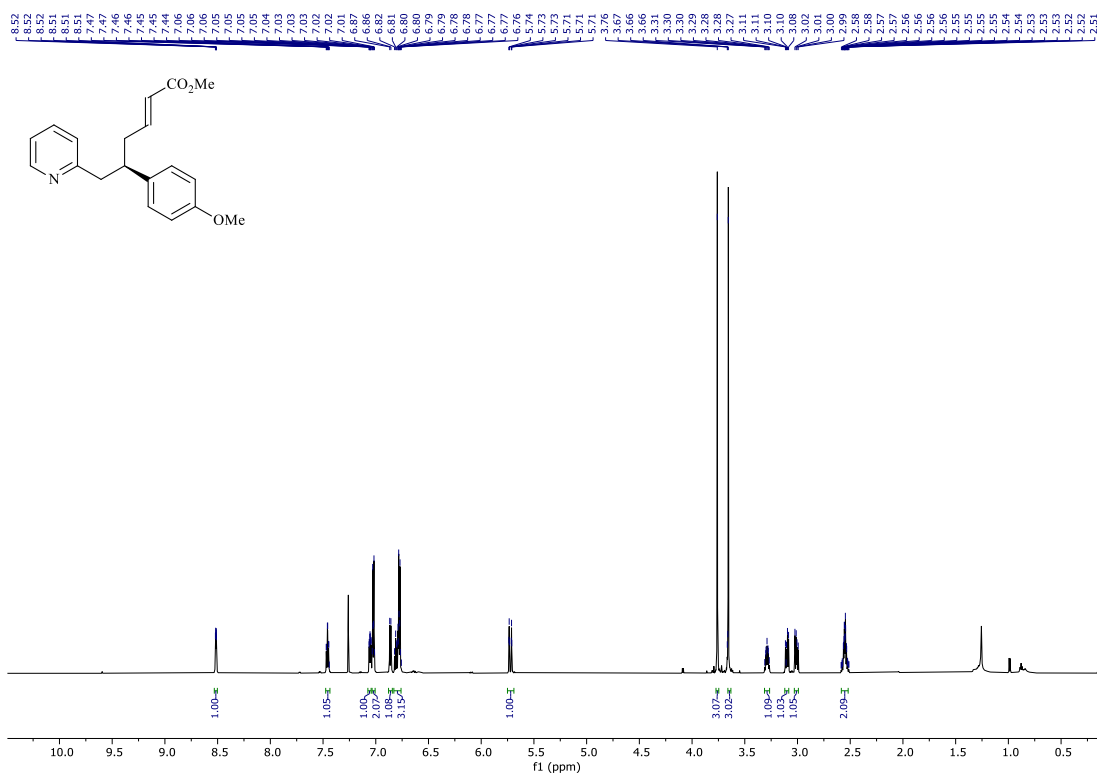

## <sup>13</sup>C NMR

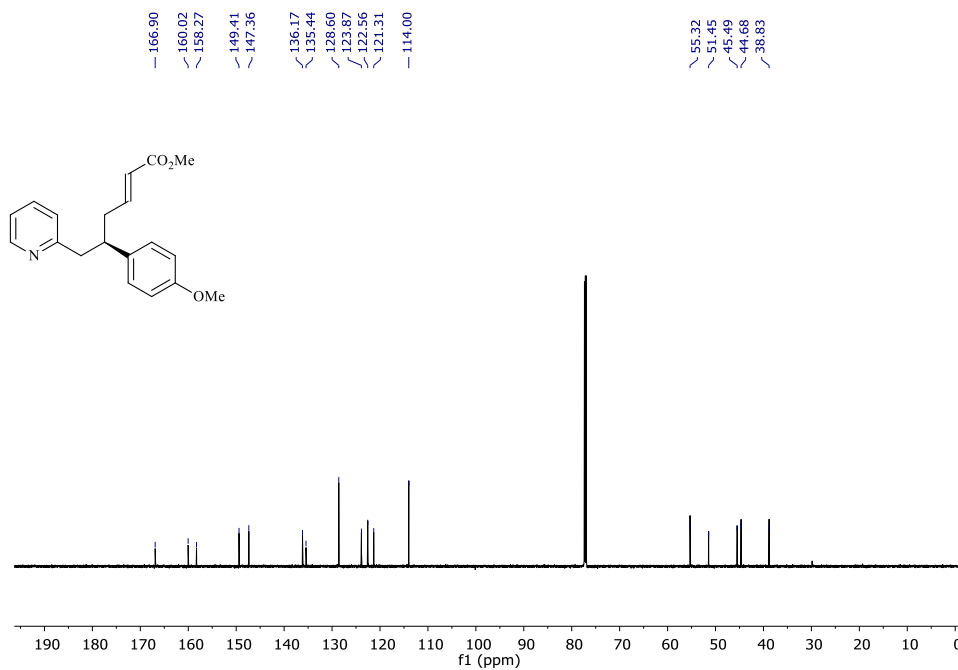



# Methyl (*R,E*)-5-(furan-2-yl)-6-(pyridin-2-yl)hex-2-enoate (6g)

## <sup>1</sup>H NMR

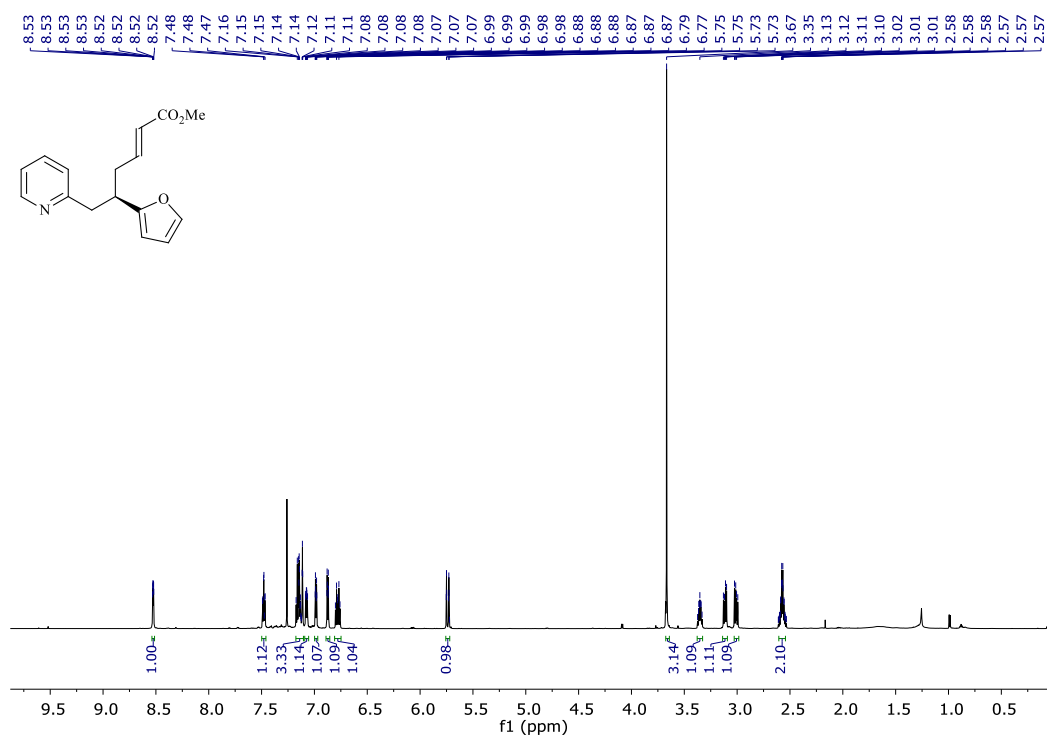

## <sup>13</sup>C NMR

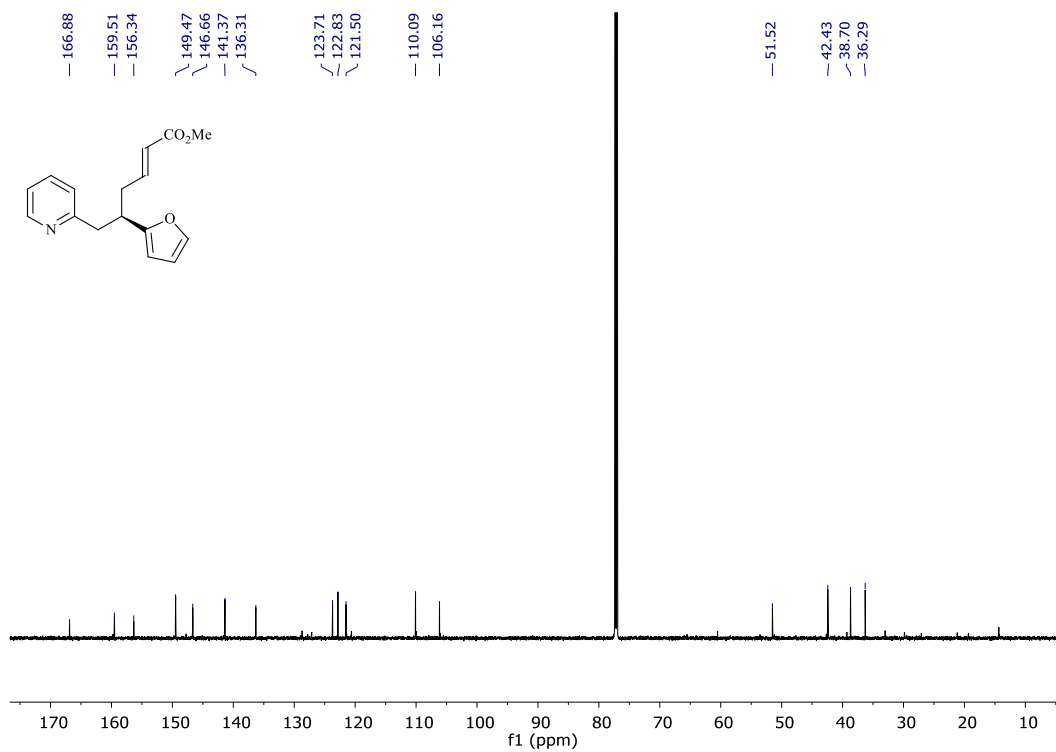



# Methyl (*R,E*)-5-(pyridin-2-ylmethyl)oct-2-enoate (6h)

## <sup>1</sup>H NMR

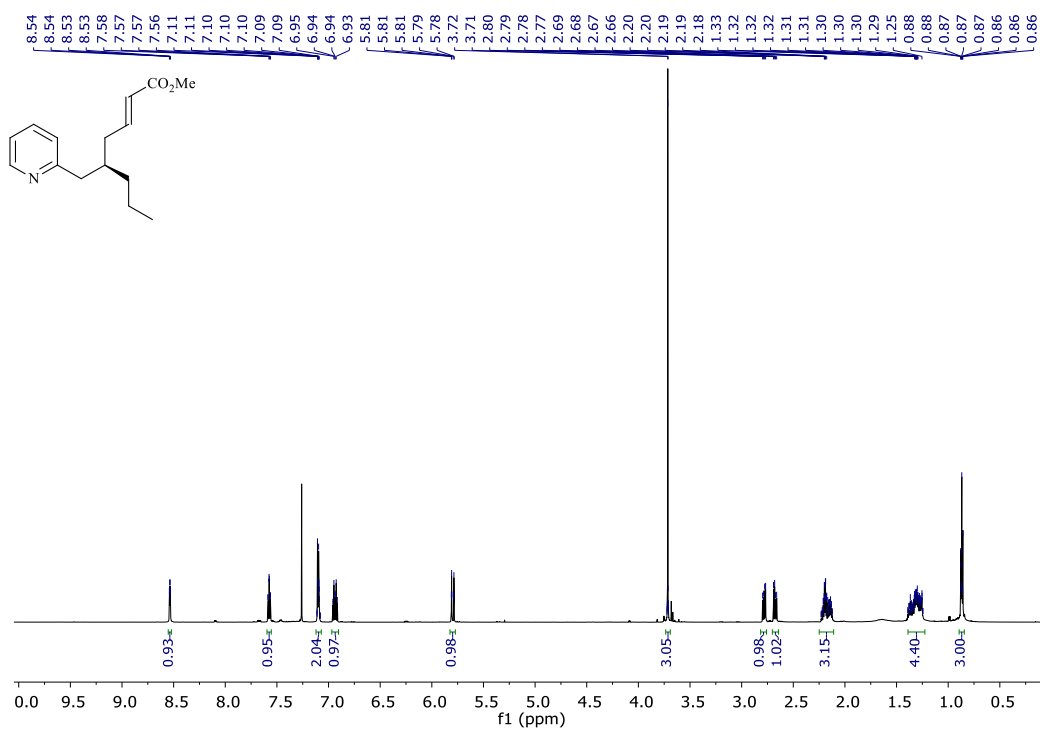

## <sup>13</sup>C NMR

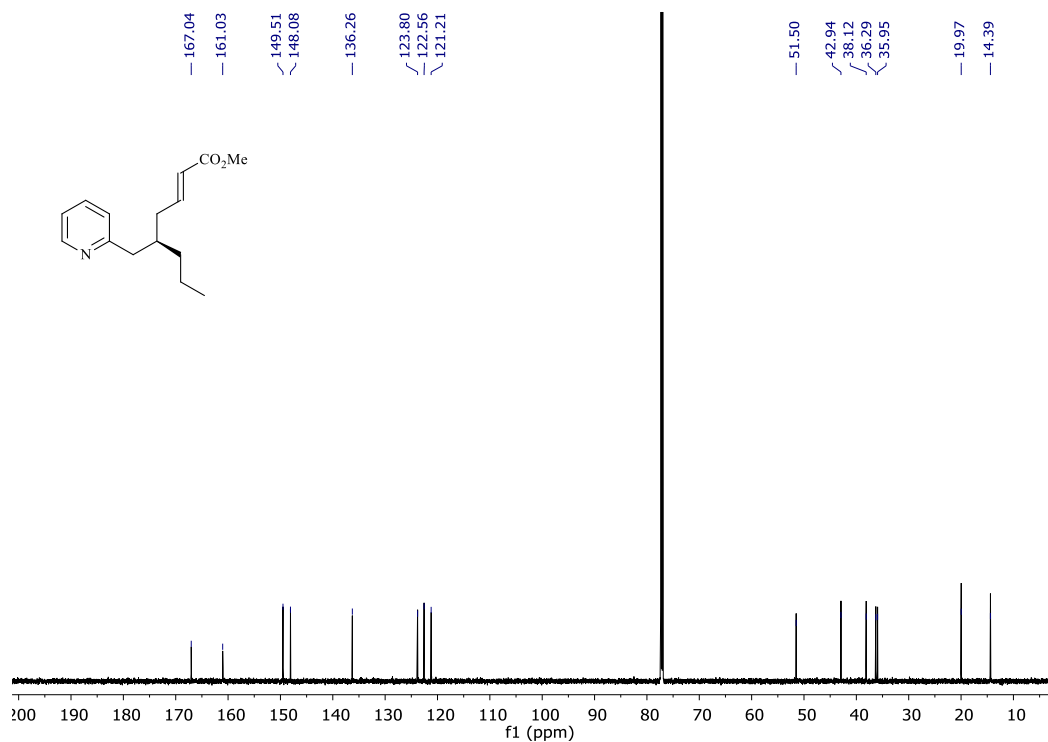

# Methyl (*R,E*)-6-(benzyloxy)-5-(pyridin-2-ylmethyl)hex-2-enoate (**6i**)

## <sup>1</sup>H NMR

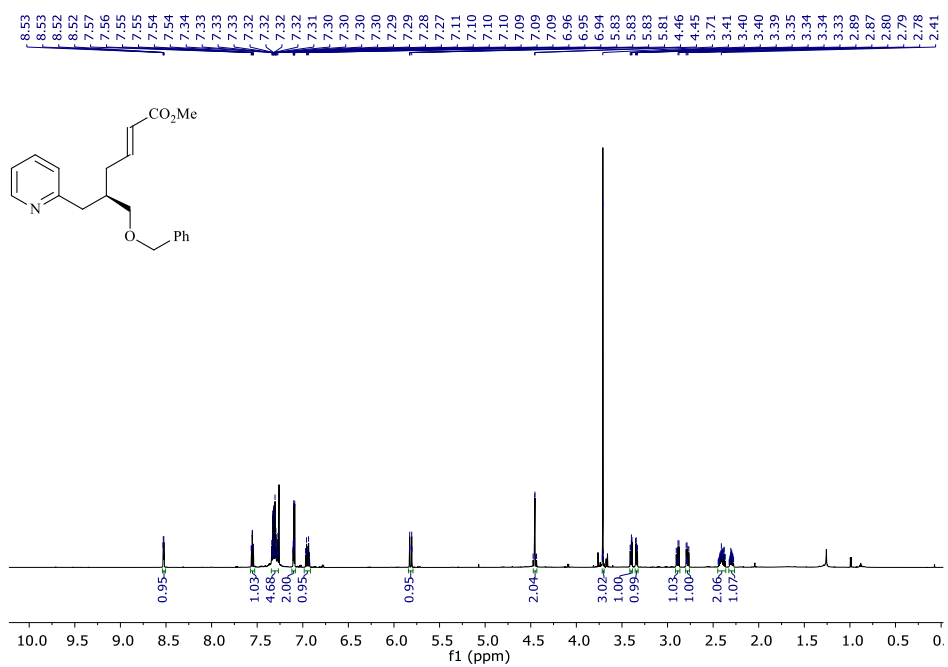

## <sup>13</sup>C NMR

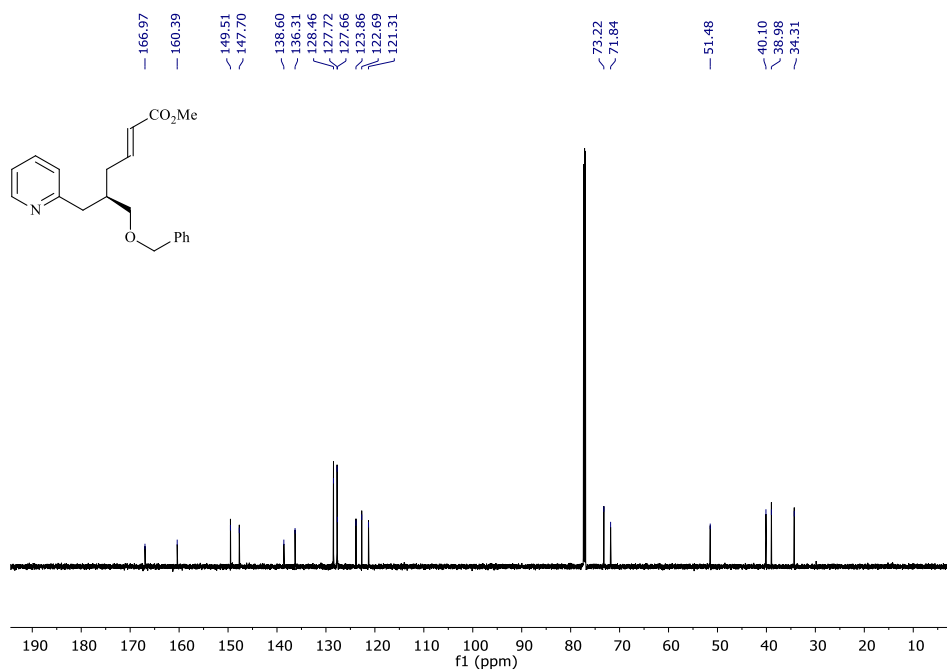

# Methyl (*R,E*)-5-phenyl-6-(pyridin-4-yl)hex-2-enoate (6j)

## <sup>1</sup>H NMR

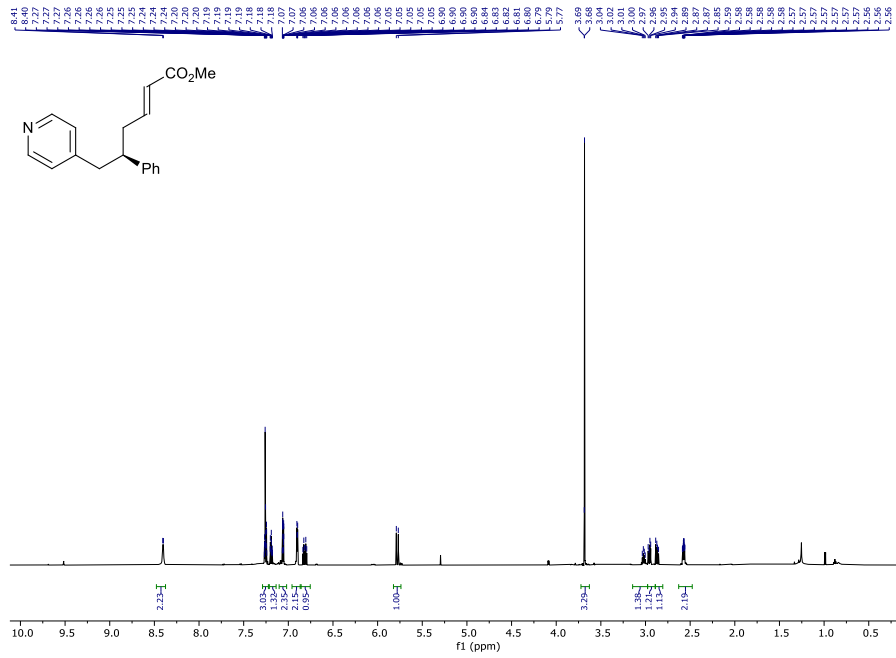

## <sup>13</sup>C NMR

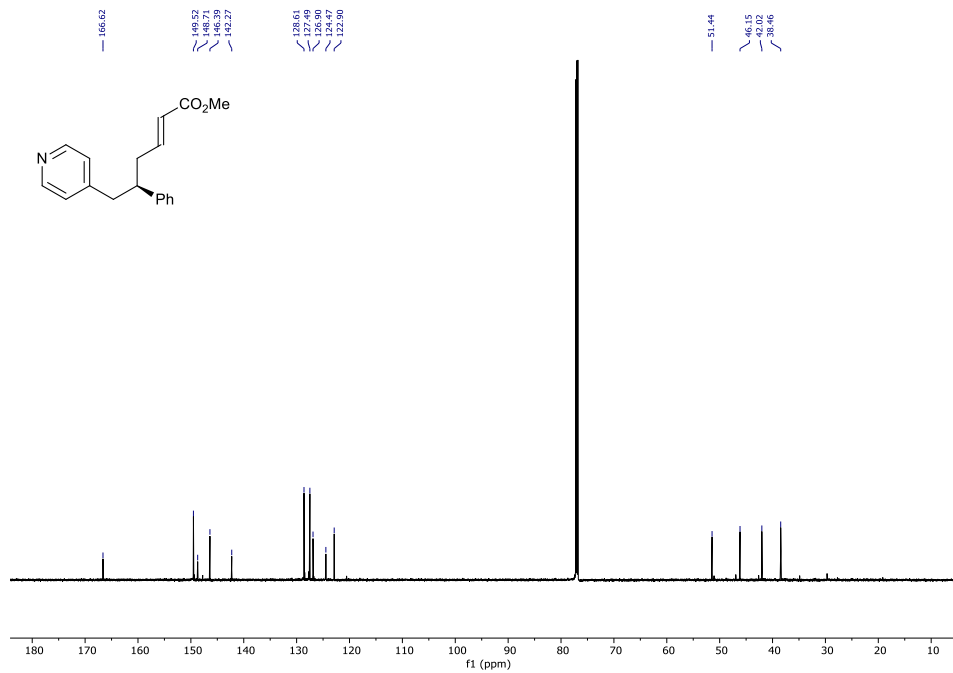

# Methyl (*R,E*)-5-phenyl-6-(quinolin-2-yl)hex-2-enoate (6k)

## <sup>1</sup>H NMR

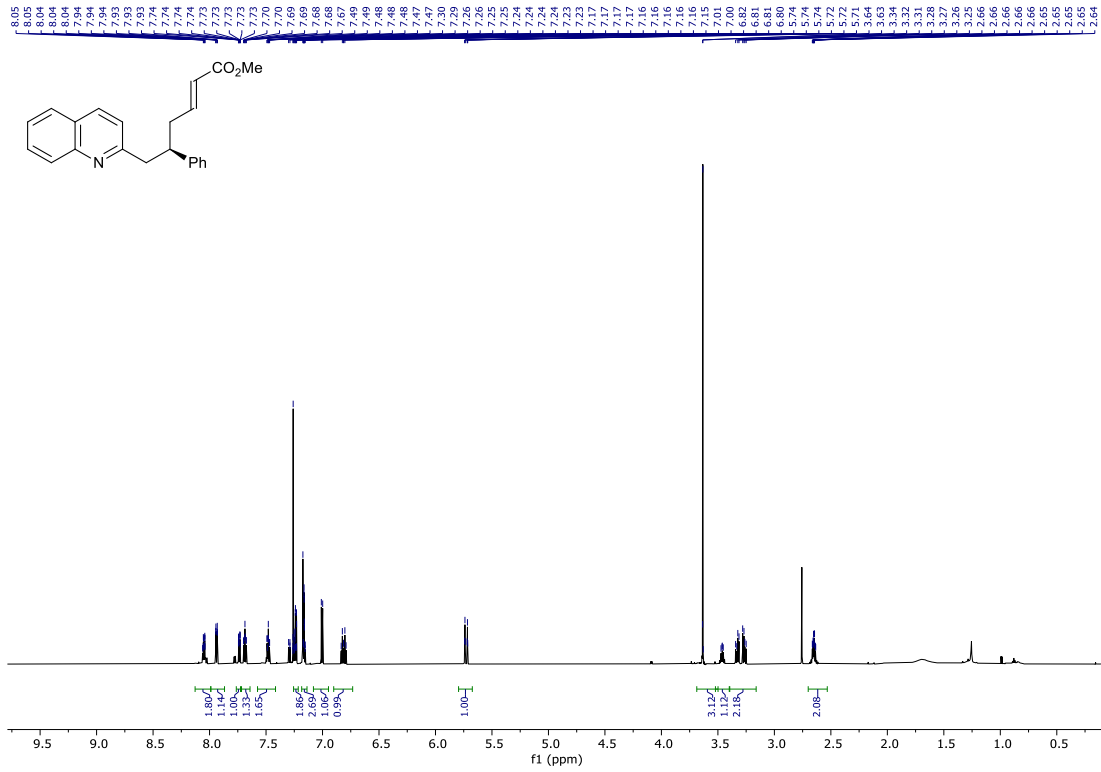

## <sup>13</sup>C NMR

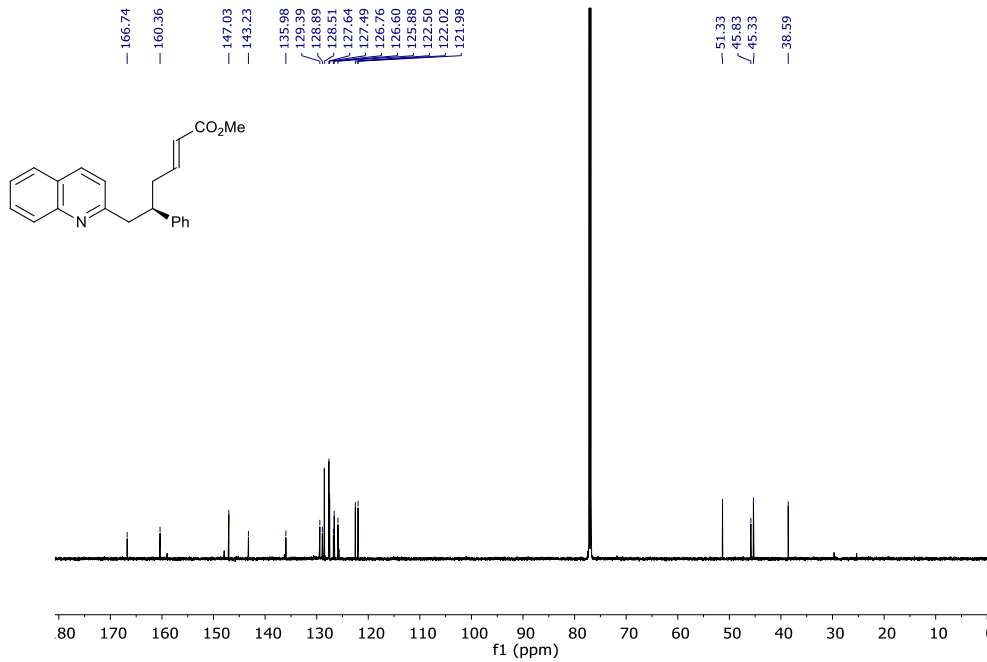

# Methyl (*R,E*)-6-(benzo[d]oxazol-2-yl)-5-phenylhex-2-enoate (6I)

## <sup>1</sup>H NMR

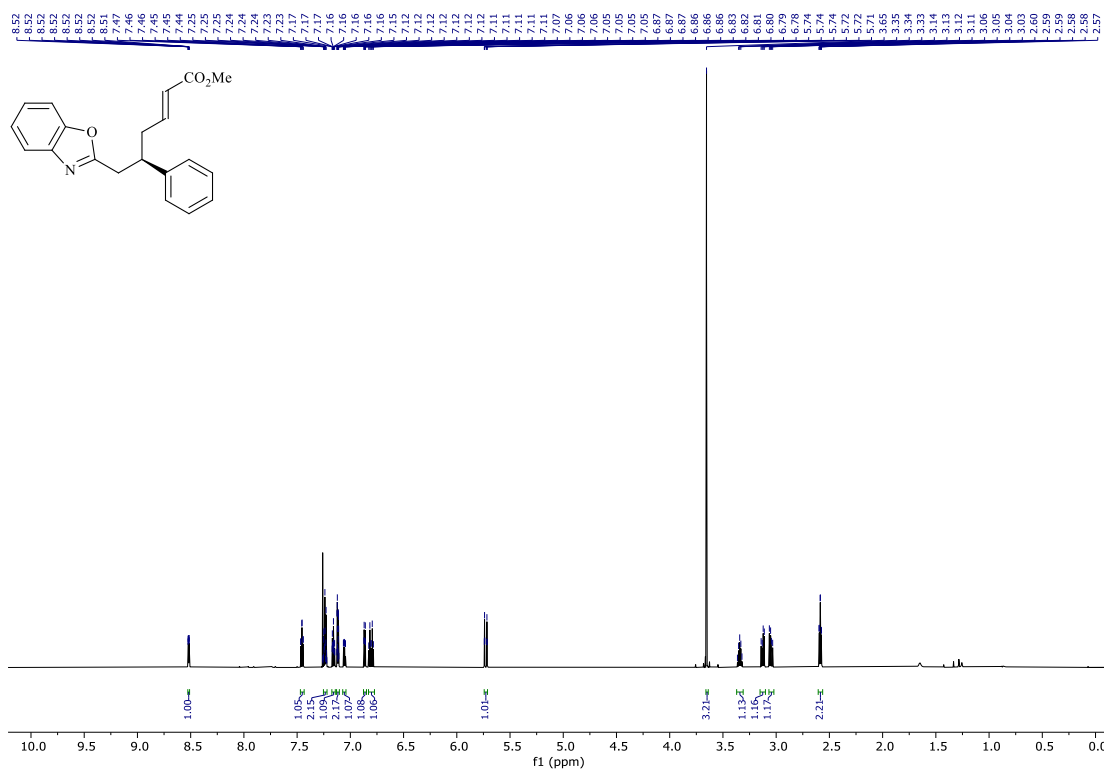

## <sup>13</sup>C NMR

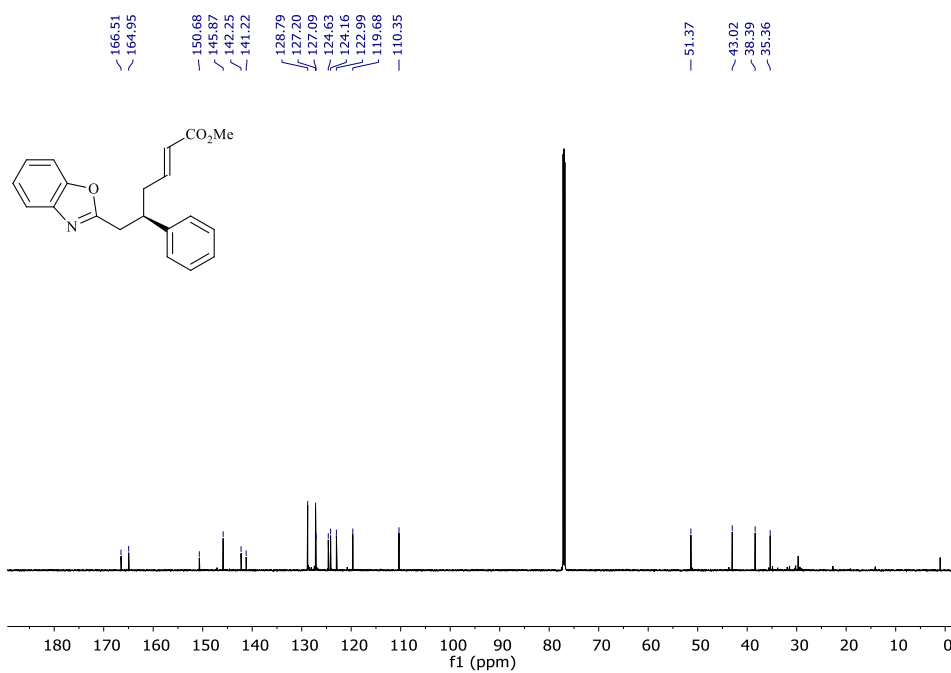

# Methyl (*R,E*)-6-(benzo[*d*]thiazol-2-yl)-5-phenylhex-2-enoate (6m)

## <sup>1</sup>H NMR

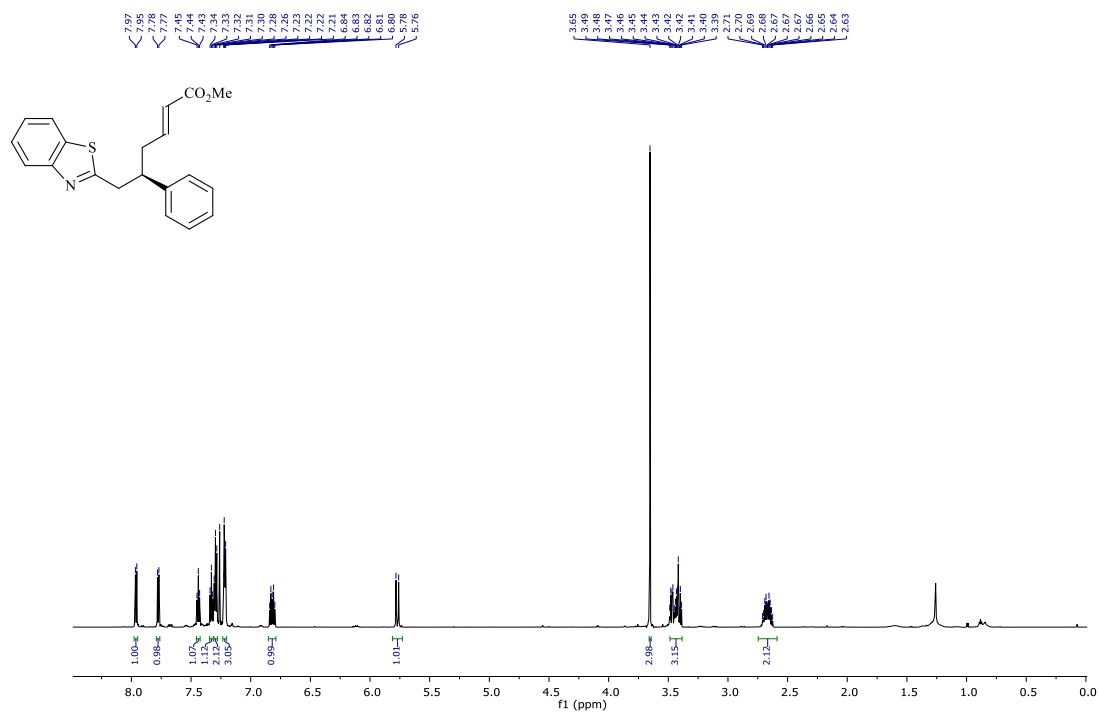

## <sup>13</sup>C NMR

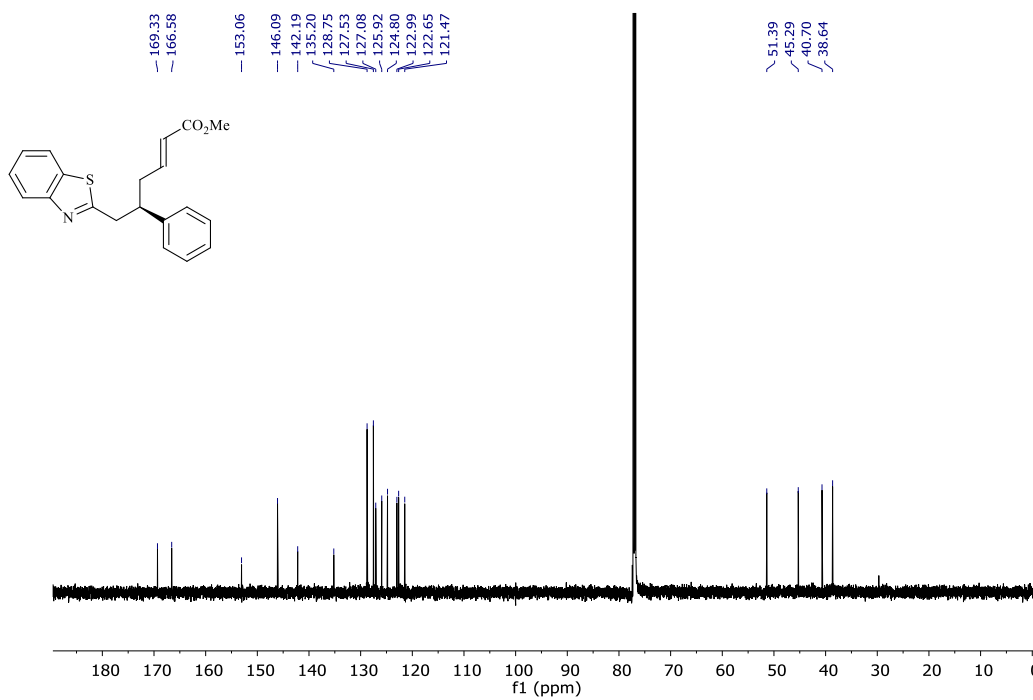

# Methyl (R)-5-phenyl-6-(pyridin-2-yl)hexanoate 13

## <sup>1</sup>H NMR

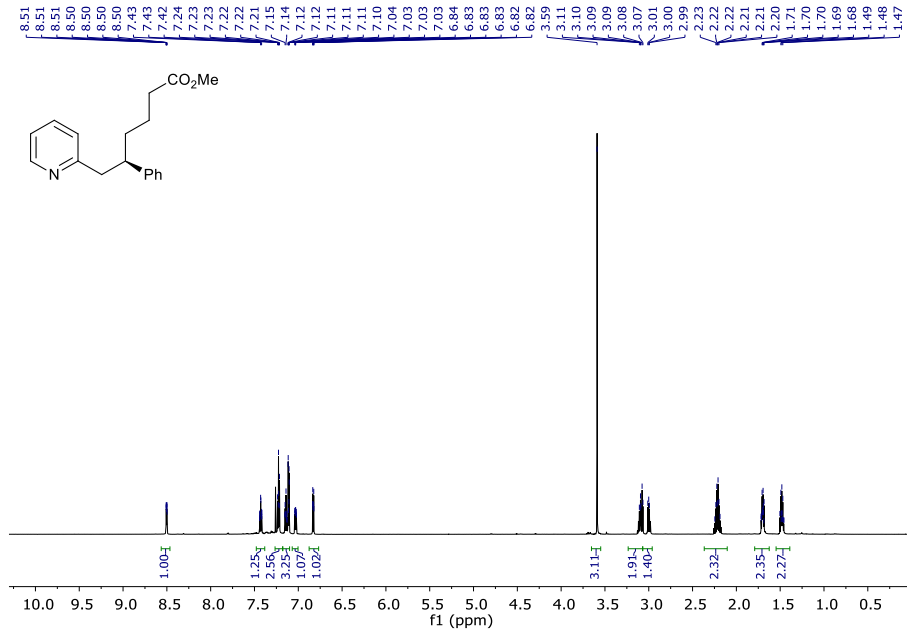

## <sup>13</sup>C NMR

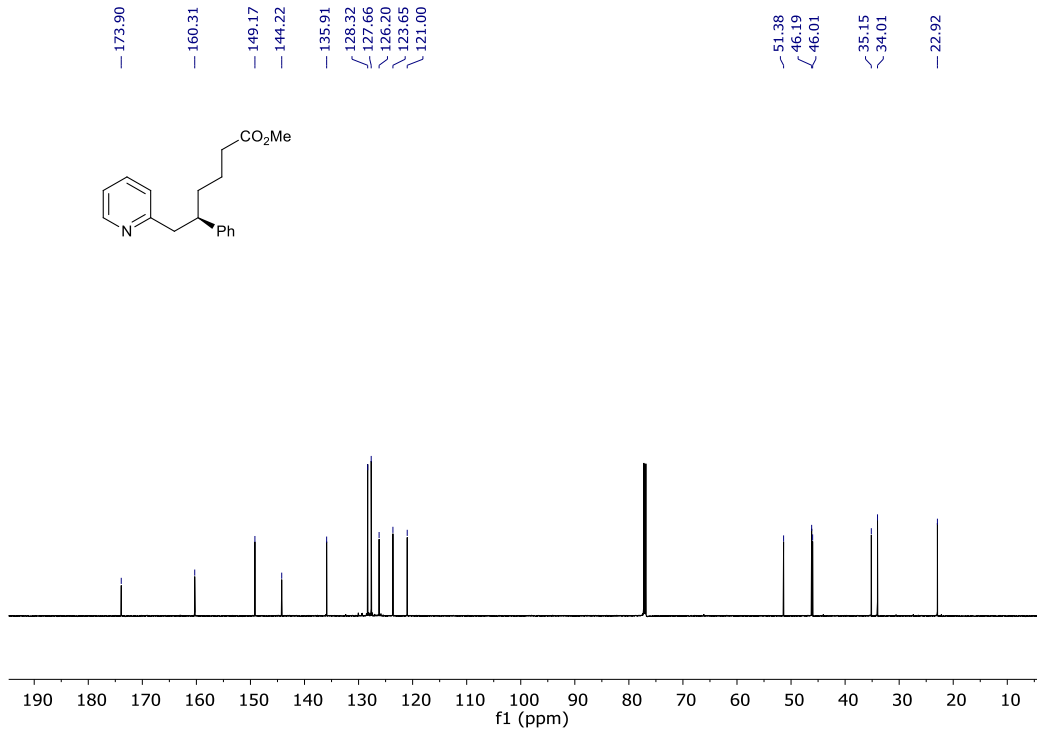

# (*R,E*)-2-(6-Methoxy-6-oxo-2-phenylhex-4-en-1-yl)pyridine 1-oxide 14

## <sup>1</sup>H NMR

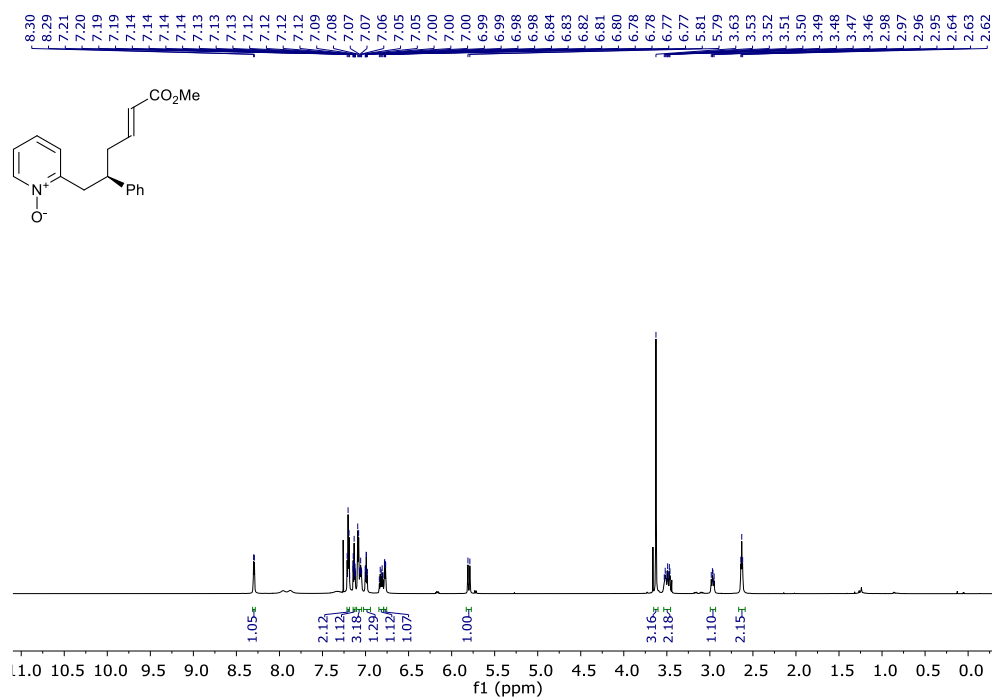

## <sup>13</sup>C NMR

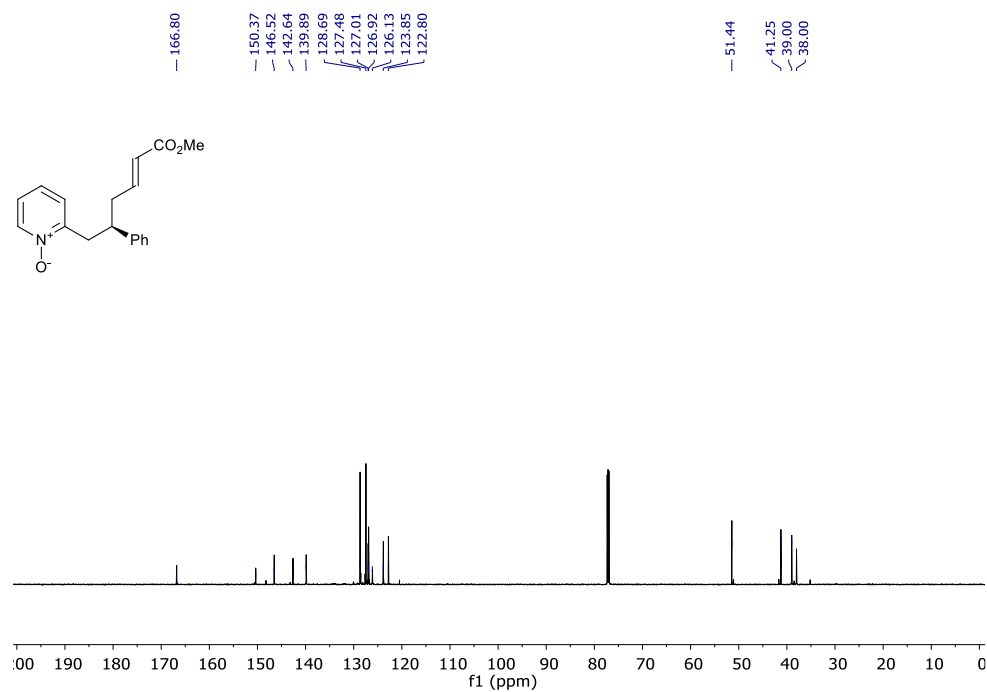





# (R)-N-(3-Phenyl-4-(pyridin-2-yl)butyl)aniline 16

## <sup>1</sup>H NMR

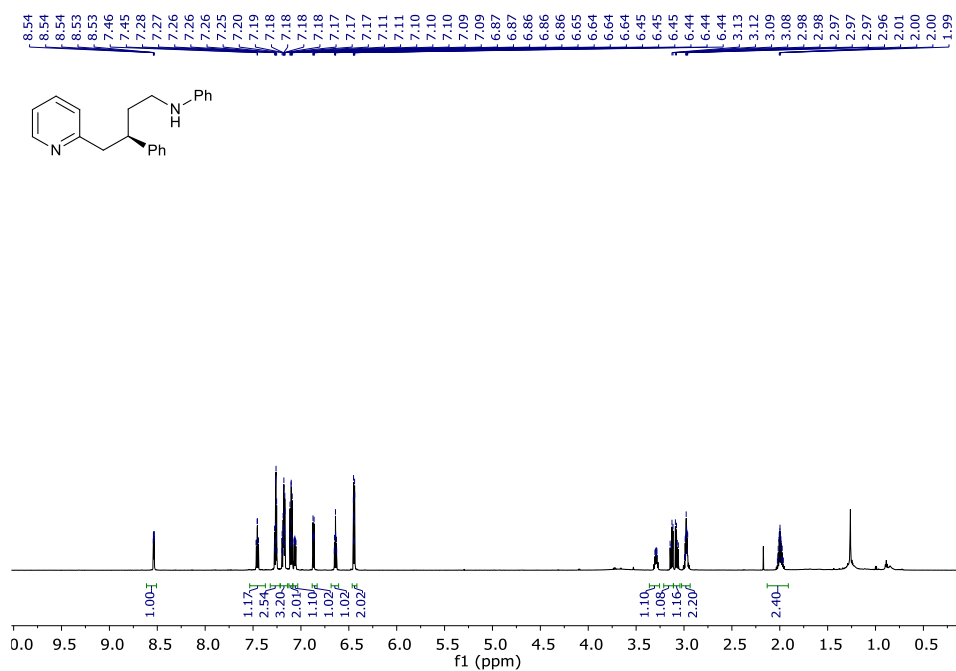

## <sup>13</sup>C NMR

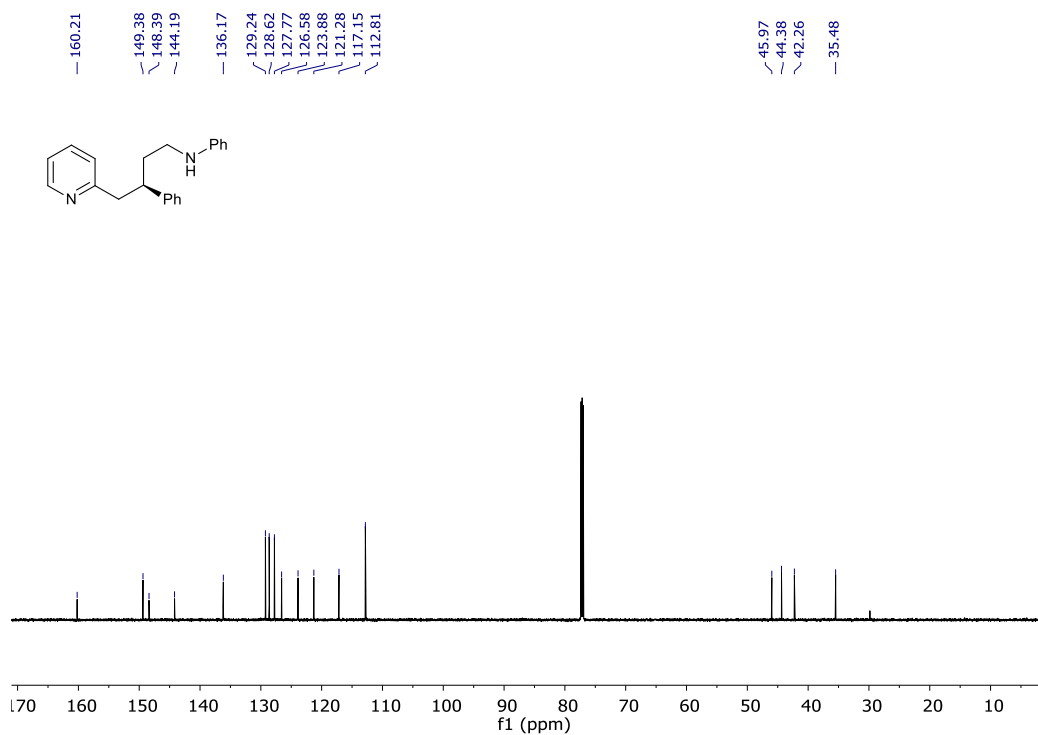

## 9. HPLC Data

### Methyl (*R,E*)-5-phenyl-6-(pyridin-2-yl)hex-2-enoate (6a)

#### Racemic sample

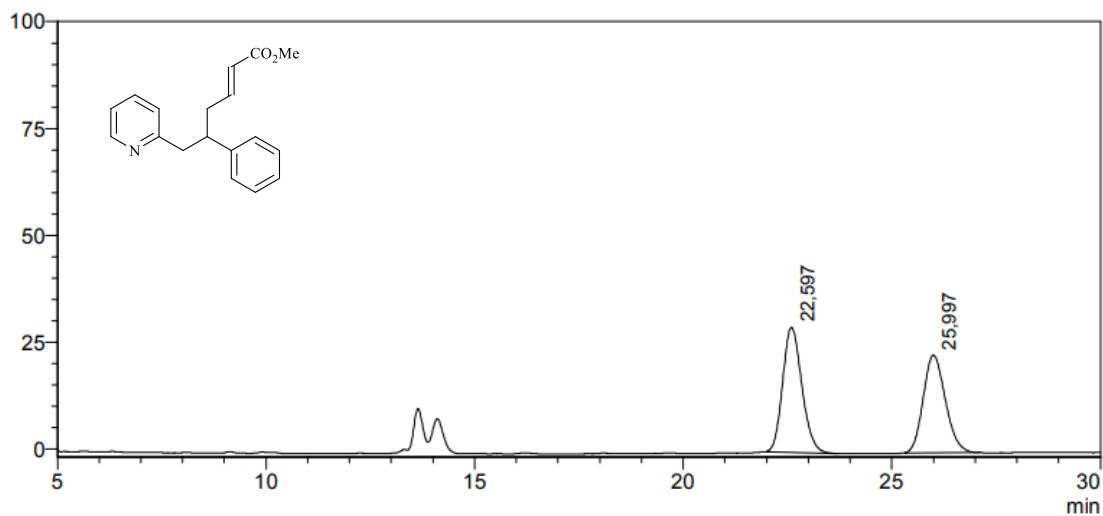

PDA Ch1 254nm

| Peak# | Ret. Time | Area%   |
|-------|-----------|---------|
| 1     | 22,597    | 52,565  |
| 2     | 25,997    | 47,435  |
| Total |           | 100,000 |

#### Enantioenriched sample

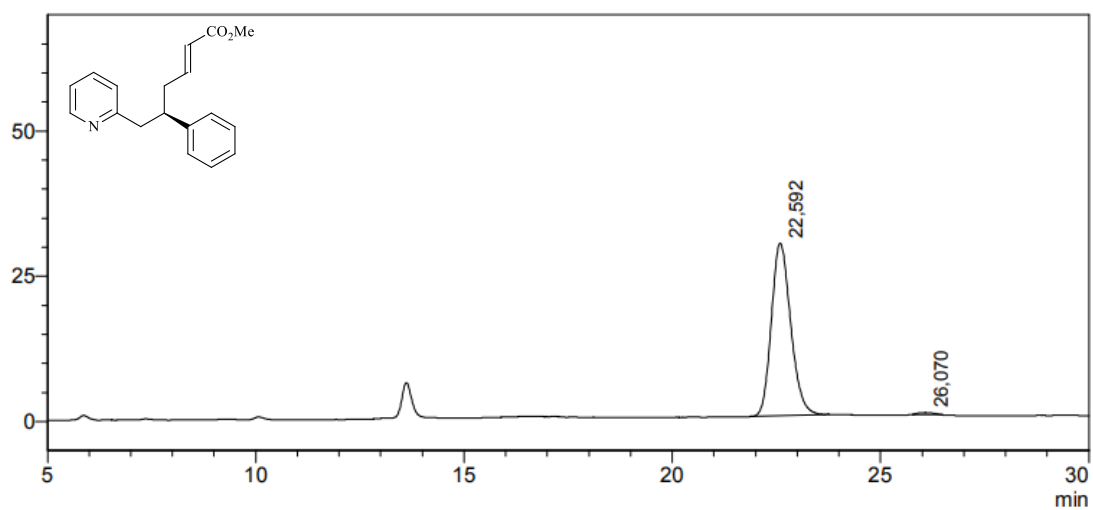

PDA Ch1 254nm

| Peak# | Ret. Time | Area%   |
|-------|-----------|---------|
| 1     | 22,592    | 99,090  |
| 2     | 26,070    | 0,910   |
| Total |           | 100,000 |

# Methyl (*R,E*)-5-(4-chlorophenyl)-6-(pyridin-2-yl)hex-2-enoate (6b)

## Racemic sample

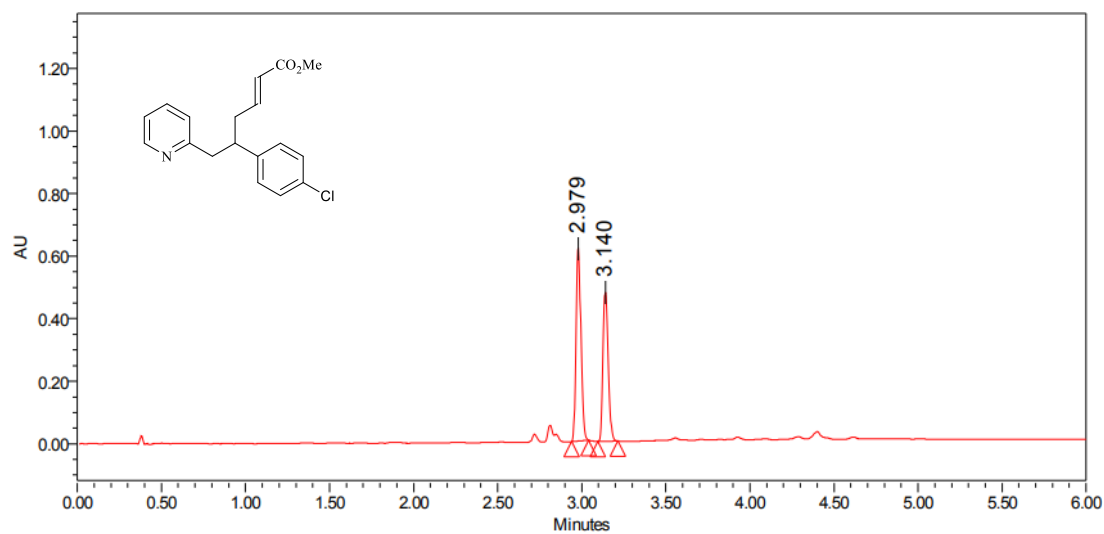

### Peak Results

|   | RT    | % Area |
|---|-------|--------|
| 1 | 2.979 | 55.02  |
| 2 | 3.140 | 44.98  |

## Enantioenriched sample

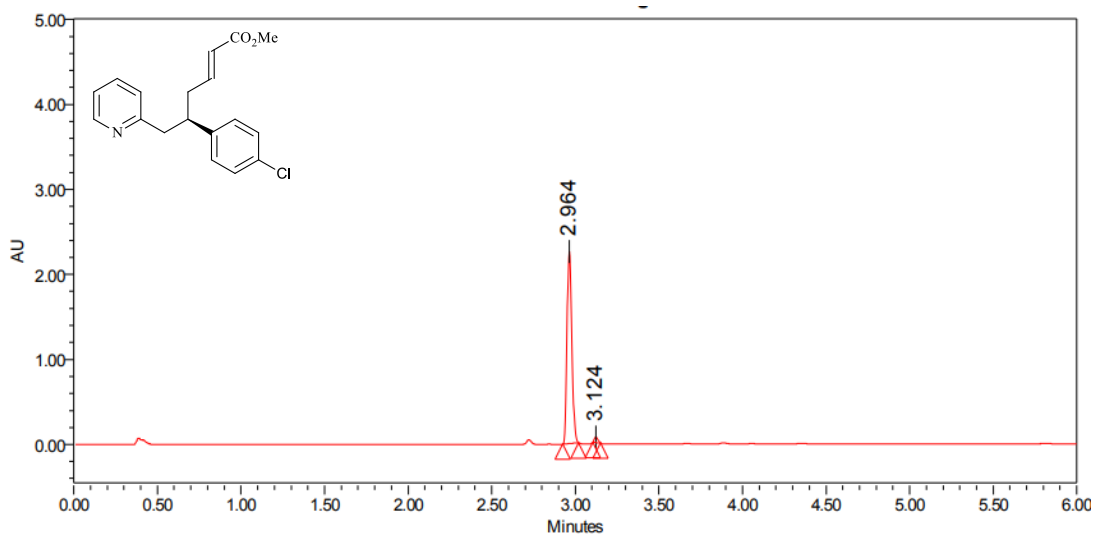

### Peak Results

|   | RT    | % Area |
|---|-------|--------|
| 1 | 2.964 | 97.83  |
| 2 | 3.124 | 2.17   |

# Methyl (*R,E*)-5-(3-chlorophenyl)-6-(pyridin-2-yl)hex-2-enoate (6c)

## Racemic sample

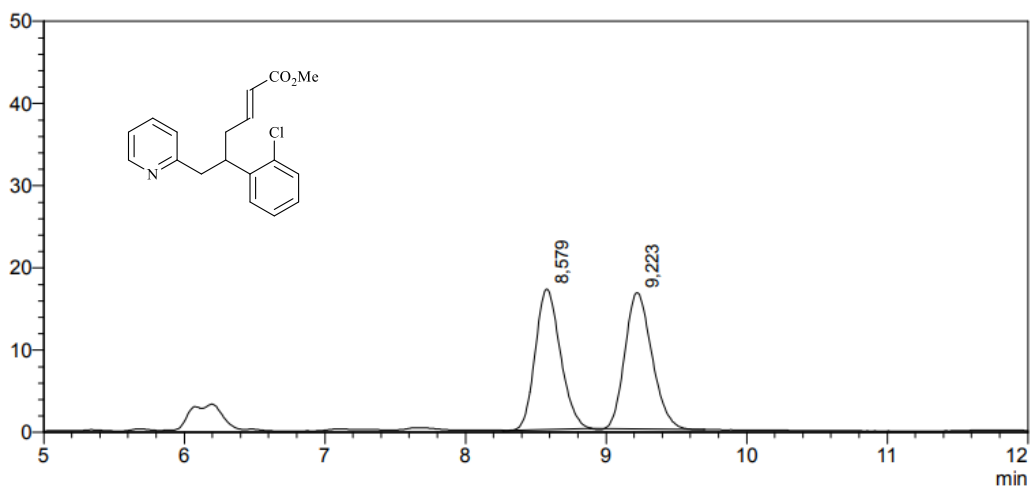

PDA Ch1 254nm

| Peak# | Ret. Time | Area%   |
|-------|-----------|---------|
| 1     | 8,579     | 48,957  |
| 2     | 9,223     | 51,043  |
| Total |           | 100,000 |

## Enantioenriched sample

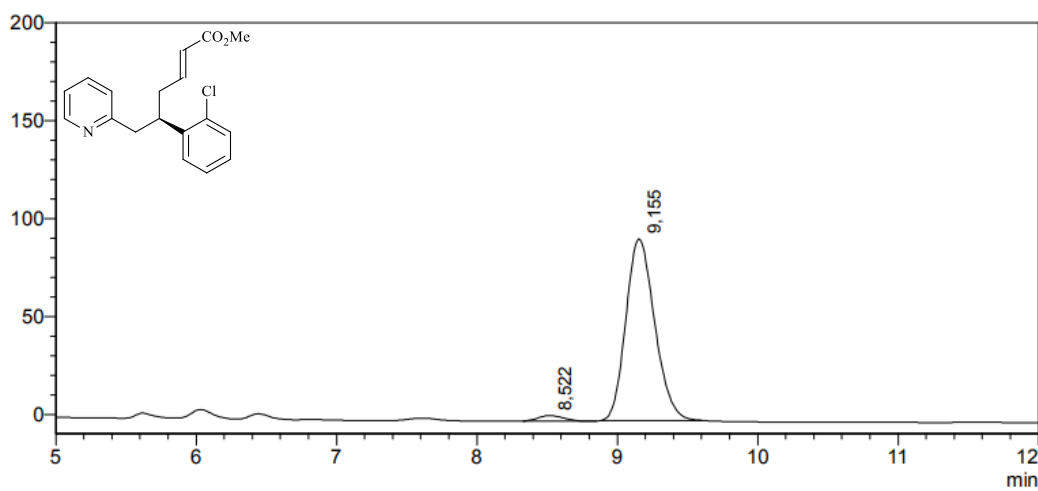

PDA Ch1 254nm

| Peak# | Ret. Time | Area%   |
|-------|-----------|---------|
| 1     | 8,522     | 2,533   |
| 2     | 9,155     | 97,467  |
| Total |           | 100,000 |

# Methyl (*R,E*)-5-(4-nitrophenyl)-6-(pyridin-2-yl)hex-2-enoate (6d)

## Racemic sample

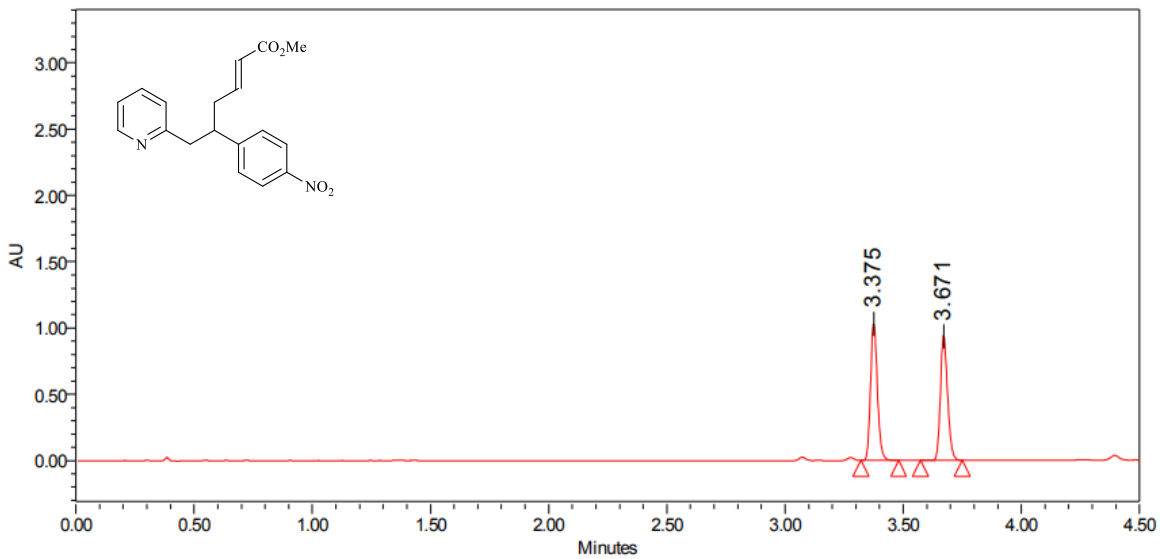

### Peak Results

|   | RT    | % Area |
|---|-------|--------|
| 1 | 3.375 | 51.27  |
| 2 | 3.671 | 48.73  |

## Enantioenriched sample

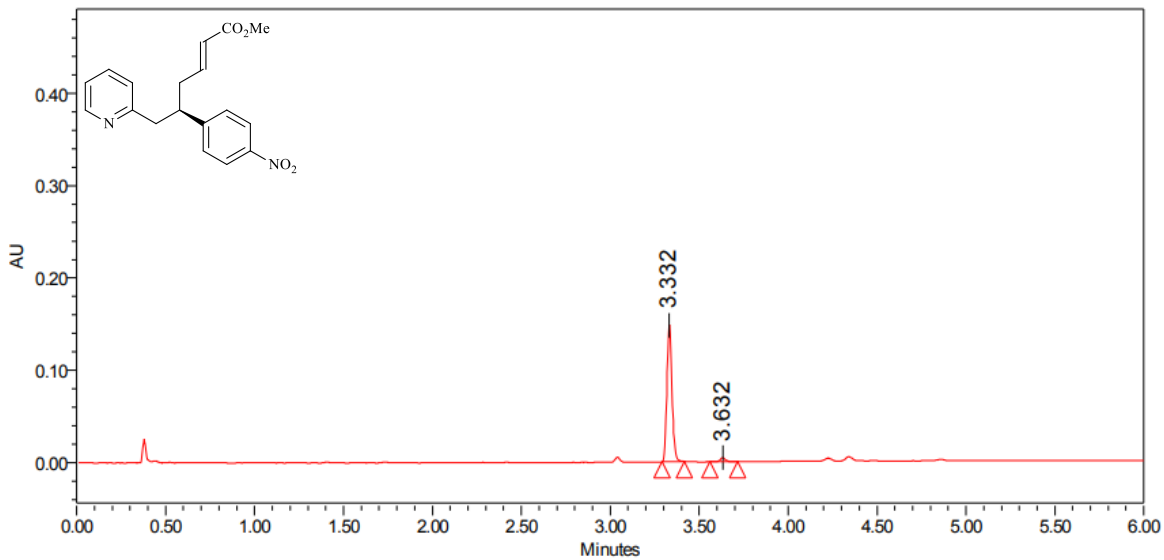

### Peak Results

|   | RT    | % Area |
|---|-------|--------|
| 1 | 3.332 | 97.10  |
| 2 | 3.632 | 2.90   |

# Methyl (*R,E*)-5-(4-methoxyphenyl)-6-(pyridin-2-yl)hex-2-enoate (6e)

## Racemic sample

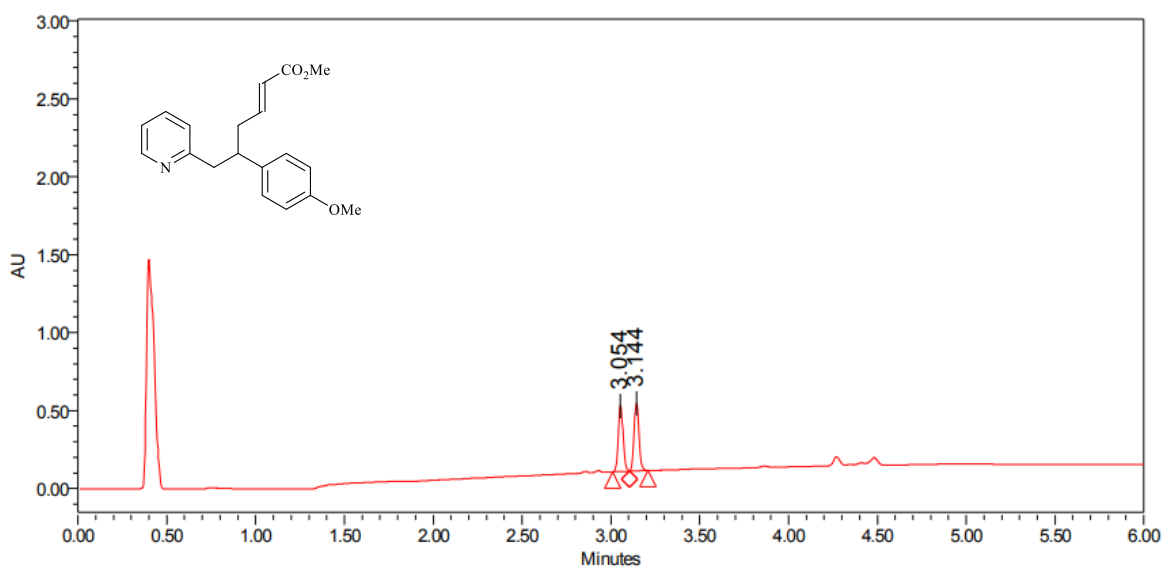

### Peak Results

|   | RT    | % Area |
|---|-------|--------|
| 1 | 3.054 | 48.98  |
| 2 | 3.144 | 51.02  |

## Enantioenriched sample

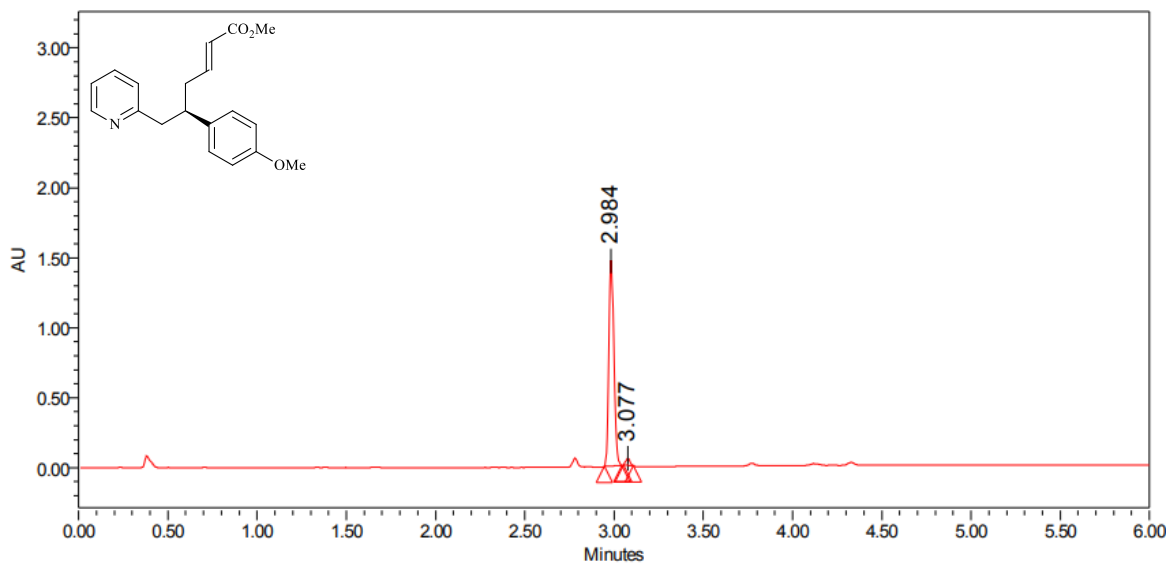

### Peak Results

|   | RT    | % Area |
|---|-------|--------|
| 1 | 2.984 | 97.25  |
| 2 | 3.077 | 2.75   |

# Methyl (*R,E*)-5-(2-methoxyphenyl)-6-(pyridin-2-yl)hex-2-enoate (6f)

## Racemic sample

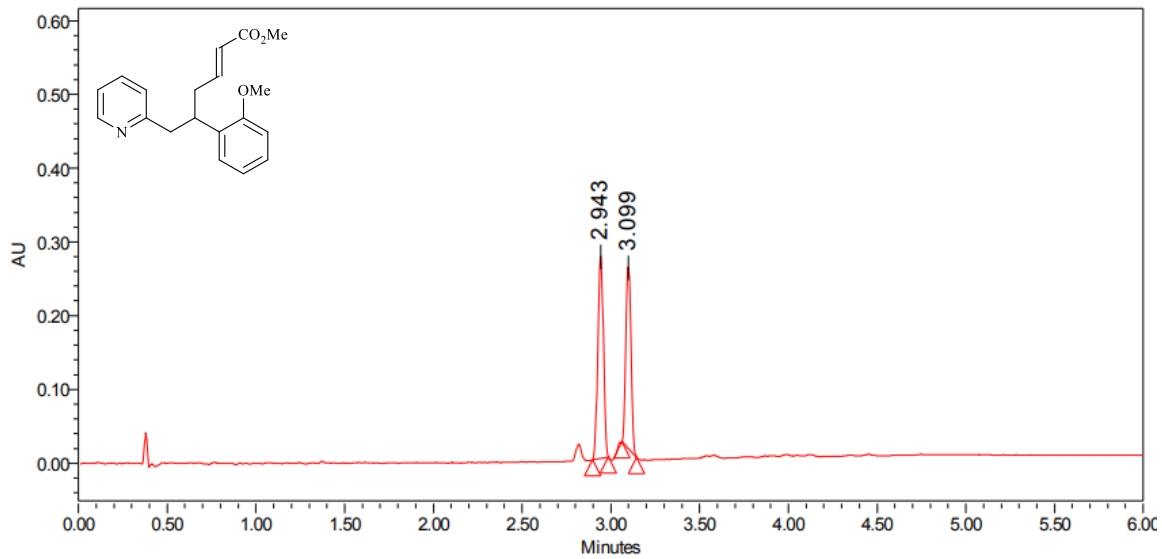

### Peak Results

|   | RT    | % Area |
|---|-------|--------|
| 1 | 2.943 | 54.46  |
| 2 | 3.099 | 45.54  |

## Enantioenriched sample

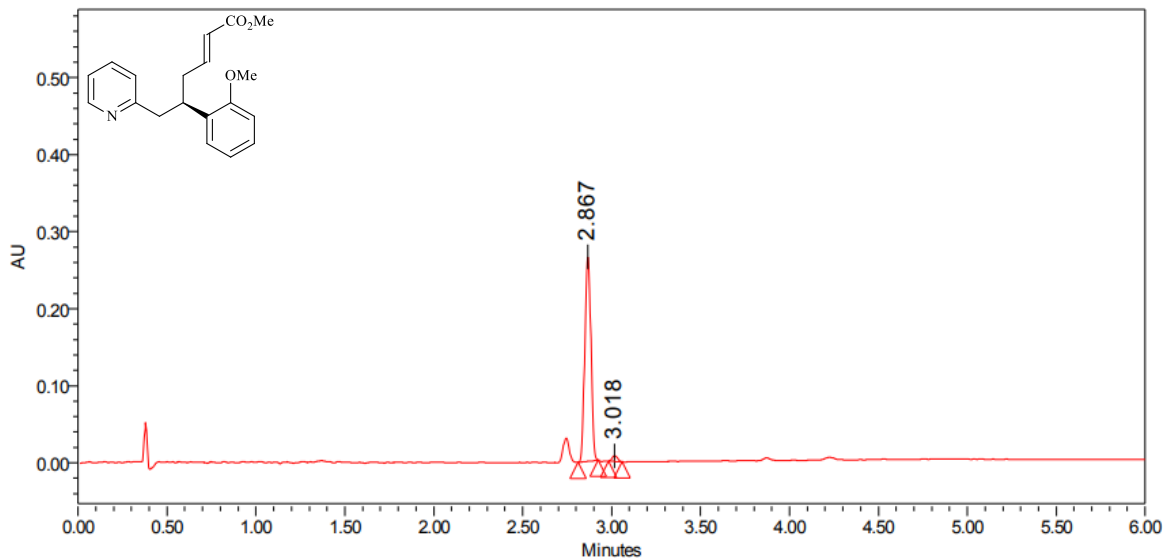

### Peak Results

|   | RT    | % Area |
|---|-------|--------|
| 1 | 2.867 | 97.57  |
| 2 | 3.018 | 2.43   |



# Methyl (*R,E*)-5-(furan-2-yl)-6-(pyridin-2-yl)hex-2-enoate (6g)

## Racemic sample

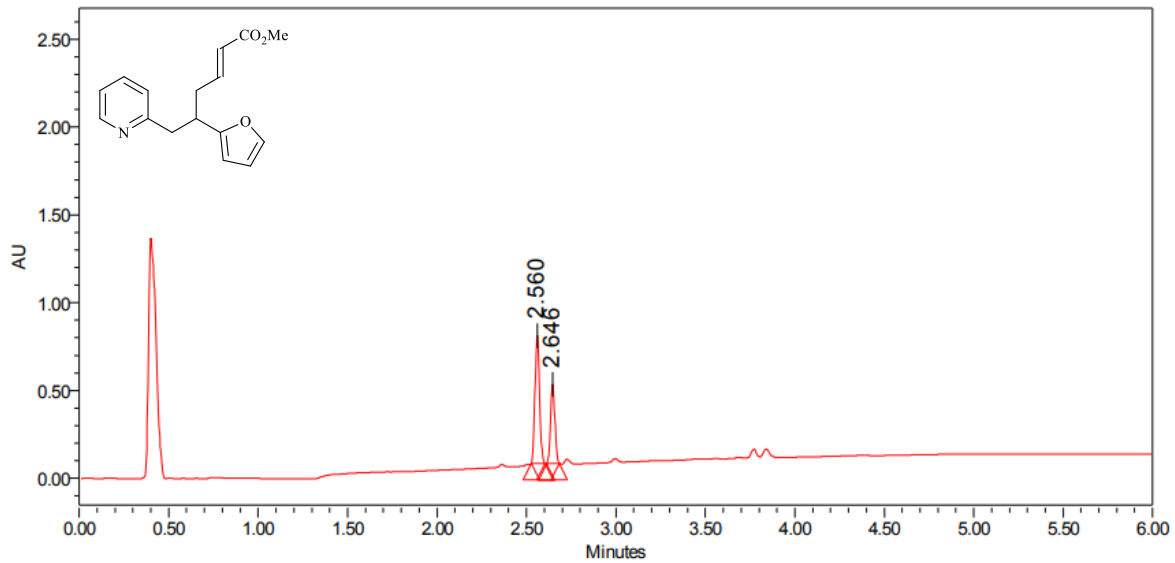

### Peak Results

|   | RT    | % Area |
|---|-------|--------|
| 1 | 2.560 | 62.93  |
| 2 | 2.646 | 37.07  |

## Enantioenriched sample

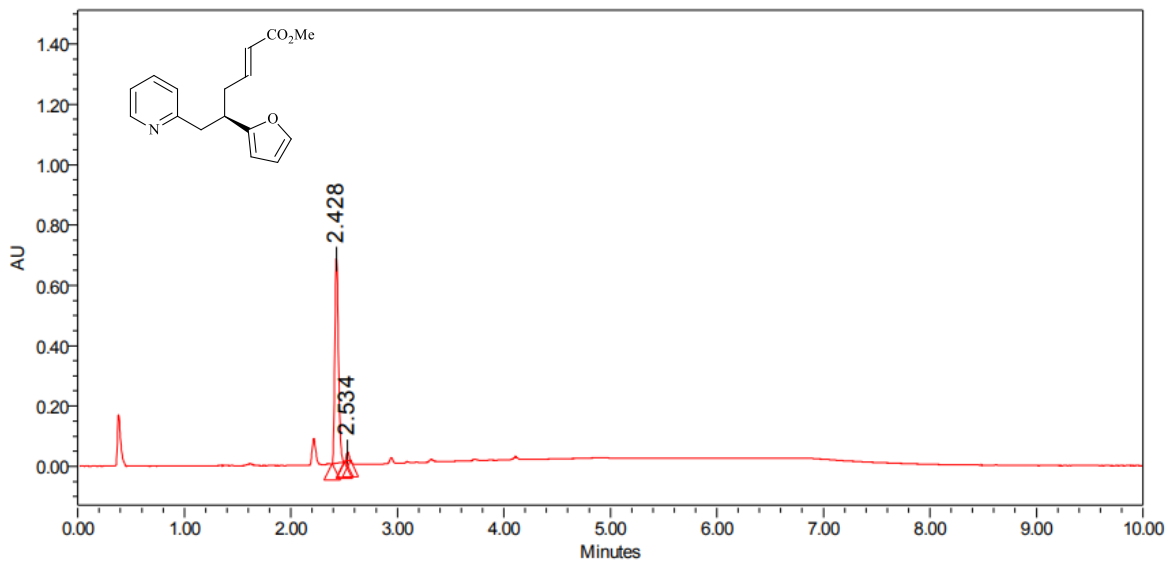

### Peak Results

|   | RT    | % Area |
|---|-------|--------|
| 1 | 2.428 | 97.11  |
| 2 | 2.534 | 2.89   |

## Methyl (*R,E*)-5-(pyridin-2-ylmethyl)oct-2-enoate (6h)

### Racemic sample

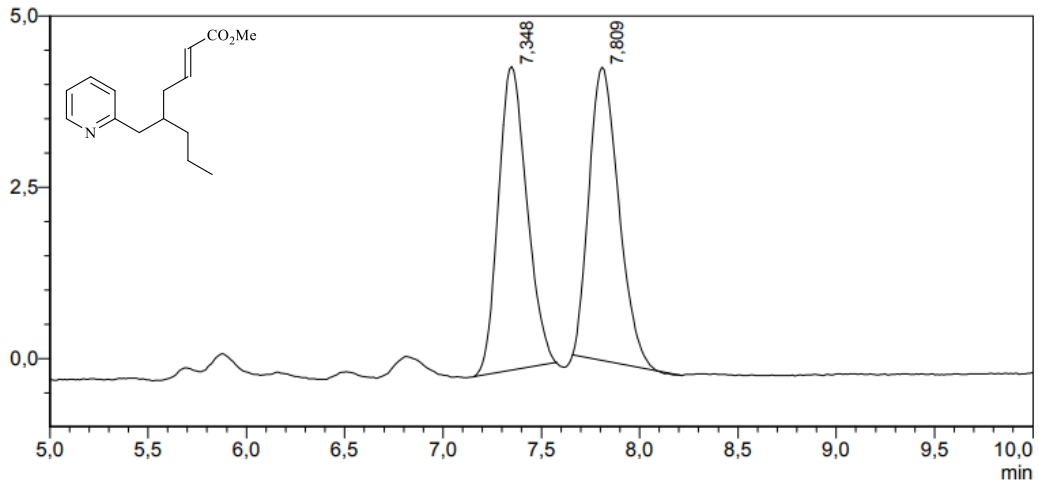

PDA Ch1 254nm

| Peak# | Ret. Time | Area%   |
|-------|-----------|---------|
| 1     | 7,348     | 49,986  |
| 2     | 7,809     | 50,014  |
| Total |           | 100,000 |

### Enantioenriched sample

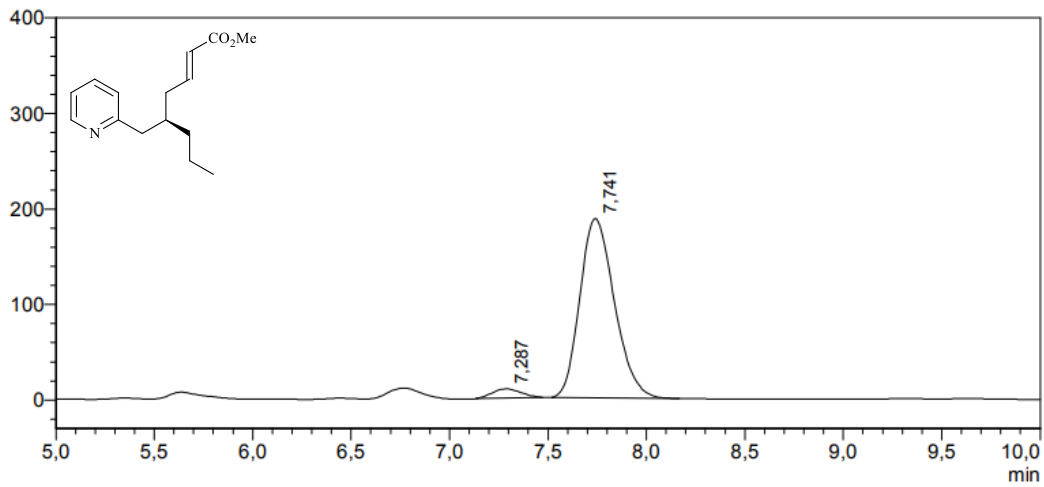

PDA Ch1 254nm

| Peak# | Ret. Time | Area%   |
|-------|-----------|---------|
| 1     | 7,287     | 4,058   |
| 2     | 7,741     | 95,942  |
| Total |           | 100,000 |

# Methyl (*R,E*)-6-(benzyloxy)-5-(pyridin-2-ylmethyl)hex-2-enoate (**6i**)

## Racemic sample

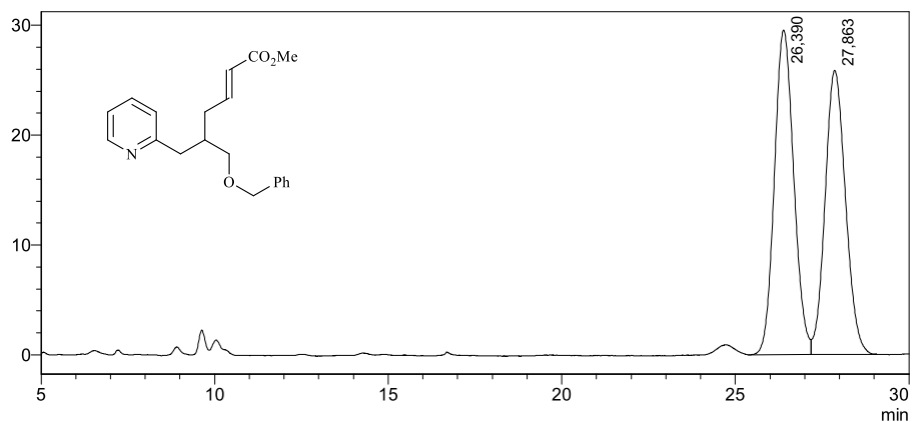

| PDA Ch1 254nm |           |         |
|---------------|-----------|---------|
| Peak#         | Ret. Time | Area%   |
| 1             | 26,390    | 52,031  |
| 2             | 27,863    | 47,969  |
| Total         |           | 100,000 |

## Enantioenriched sample

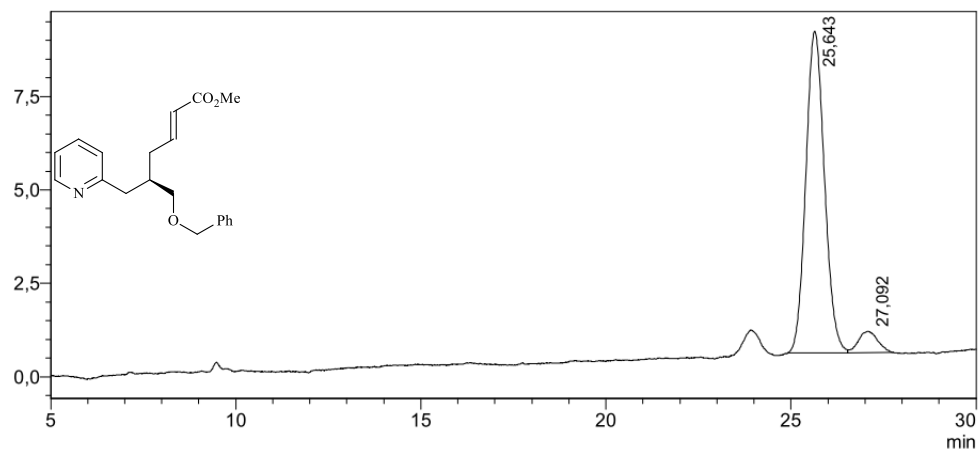

| PDA Ch1 254nm |           |         |
|---------------|-----------|---------|
| Peak#         | Ret. Time | Area%   |
| 1             | 25,643    | 93,544  |
| 2             | 27,092    | 6,456   |
| Total         |           | 100,000 |

# Methyl (*R,E*)-5-phenyl-6-(pyridin-4-yl)hex-2-enoate (**6j**)

## Racemic sample

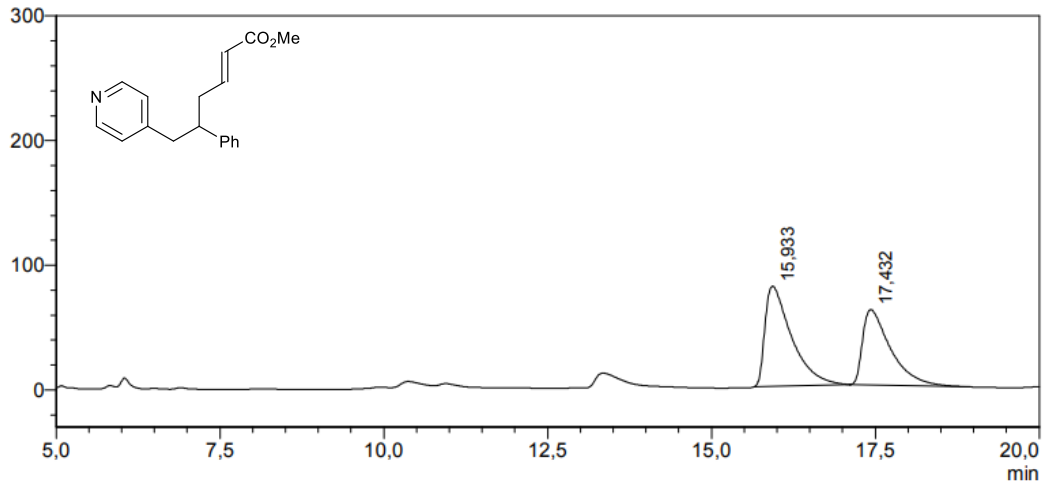

| PDA Ch1 254nm |           |         |
|---------------|-----------|---------|
| Peak#         | Ret. Time | Area%   |
| 1             | 15,933    | 55,797  |
| 2             | 17,432    | 44,203  |
| Total         |           | 100,000 |

## Enantioenriched sample

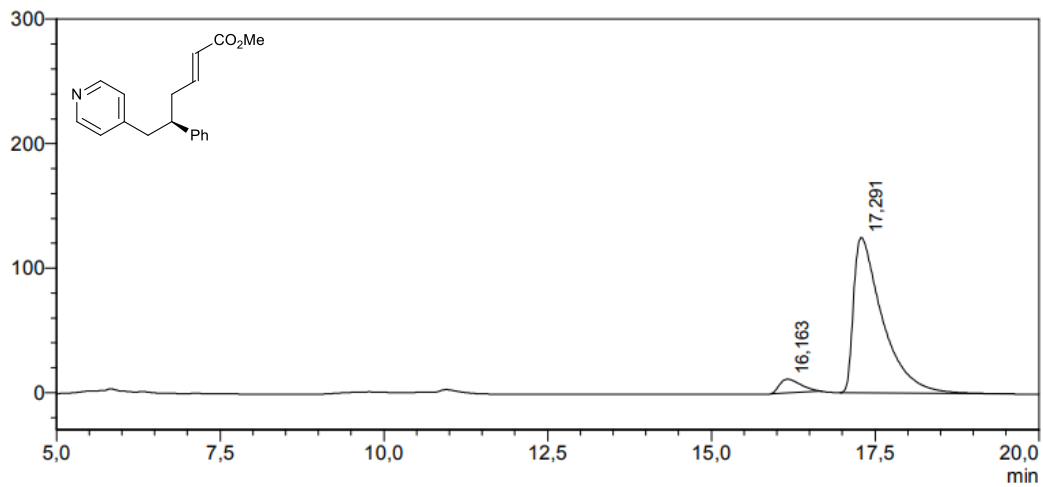

| PDA Ch1 254nm |           |         |
|---------------|-----------|---------|
| Peak#         | Ret. Time | Area%   |
| 1             | 16,163    | 6,039   |
| 2             | 17,291    | 93,961  |
| Total         |           | 100,000 |

## Methyl (*R,E*)-5-phenyl-6-(quinolin-2-yl)hex-2-enoate (6k)

### Racemic sample

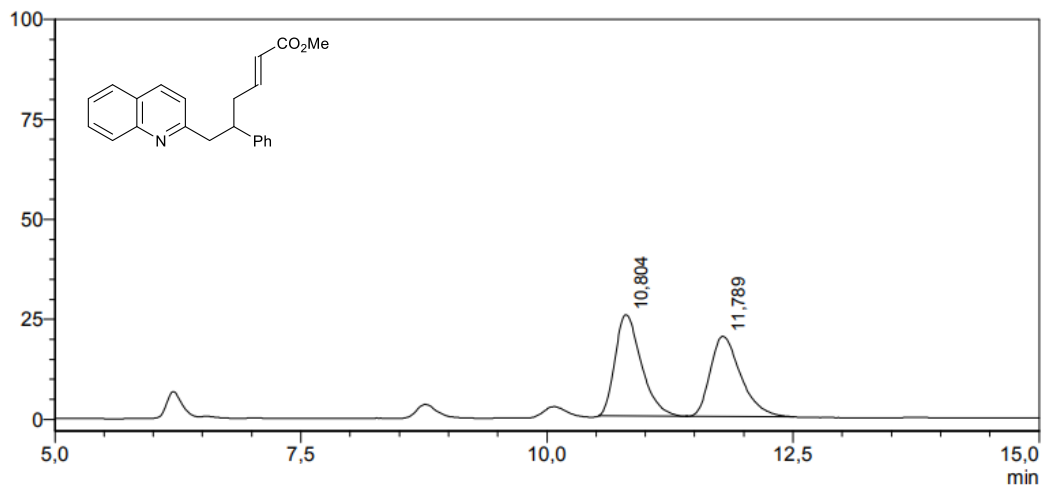

PDA Ch1 254nm

| Peak# | Ret. Time | Area%   |
|-------|-----------|---------|
| 1     | 10,804    | 52,013  |
| 2     | 11,789    | 47,987  |
| Total |           | 100,000 |

### Enantioenriched sample

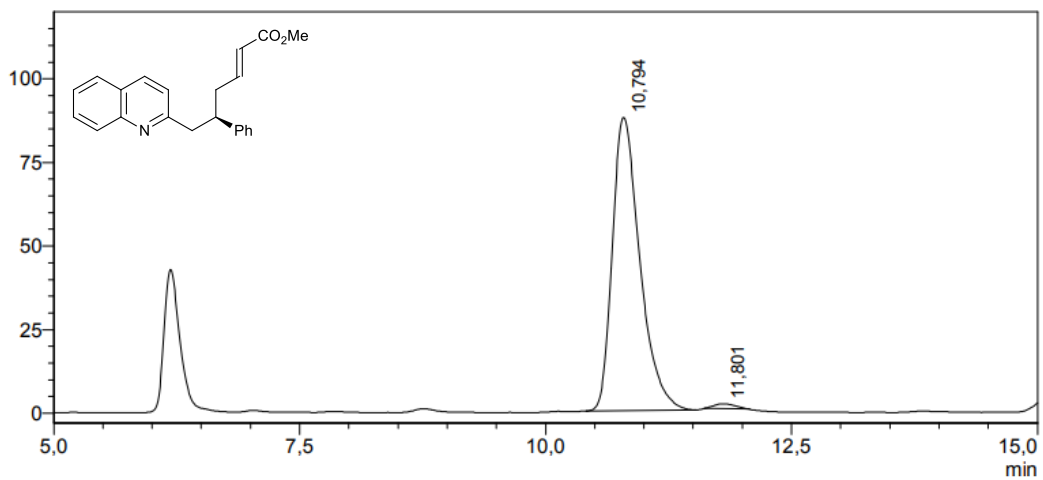

PDA Ch1 254nm

| Peak# | Ret. Time | Area%   |
|-------|-----------|---------|
| 1     | 10,794    | 98,680  |
| 2     | 11,801    | 1,320   |
| Total |           | 100,000 |

# Methyl (*R,E*)-6-(benzo[d]oxazol-2-yl)-5-phenylhex-2-enoate (6I)

## Racemic sample

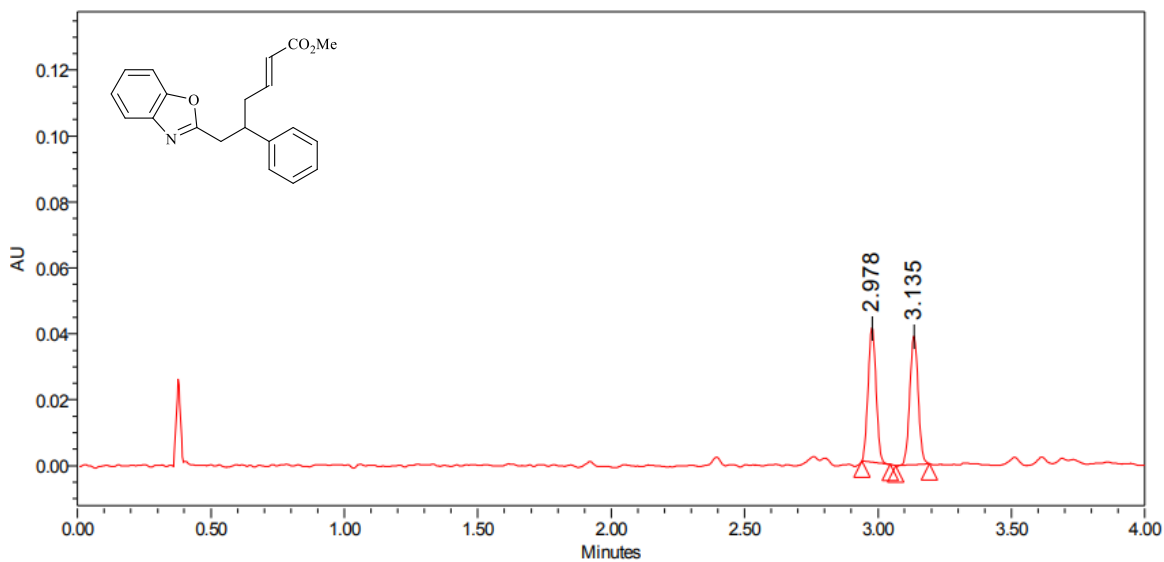

### Peak Results

|   | RT    | % Area |
|---|-------|--------|
| 1 | 2.978 | 49.80  |
| 2 | 3.135 | 50.20  |

## Enantioenriched sample

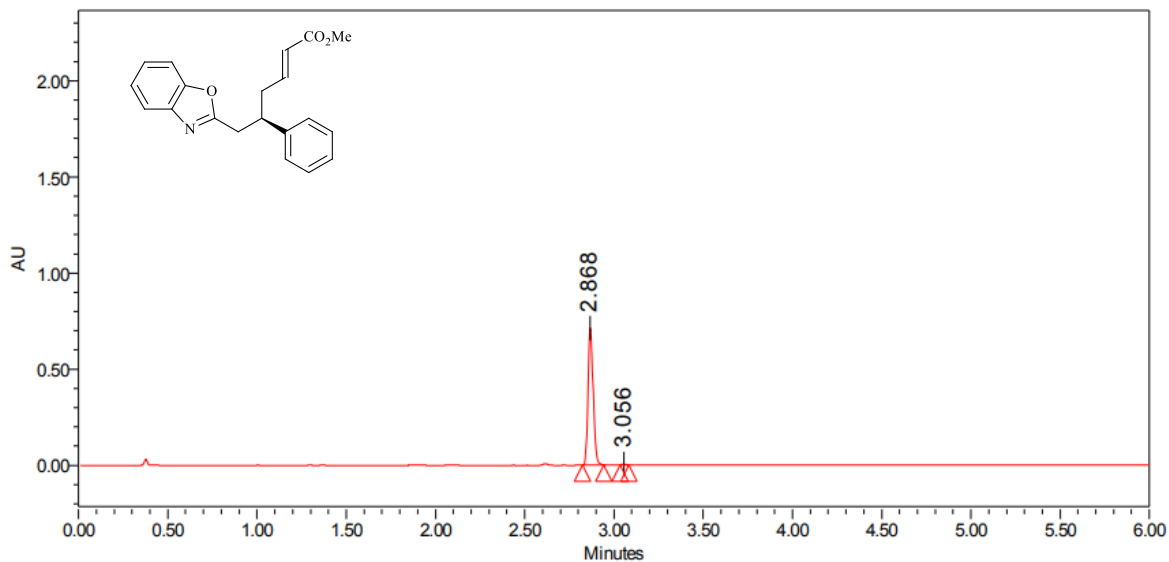

### Peak Results

|   | RT    | % Area |
|---|-------|--------|
| 1 | 2.868 | 99.57  |
| 2 | 3.056 | 0.43   |

# Methyl (*R,E*)-6-(benzo[*d*]thiazol-2-yl)-5-phenylhex-2-enoate (6m)

## Racemic sample

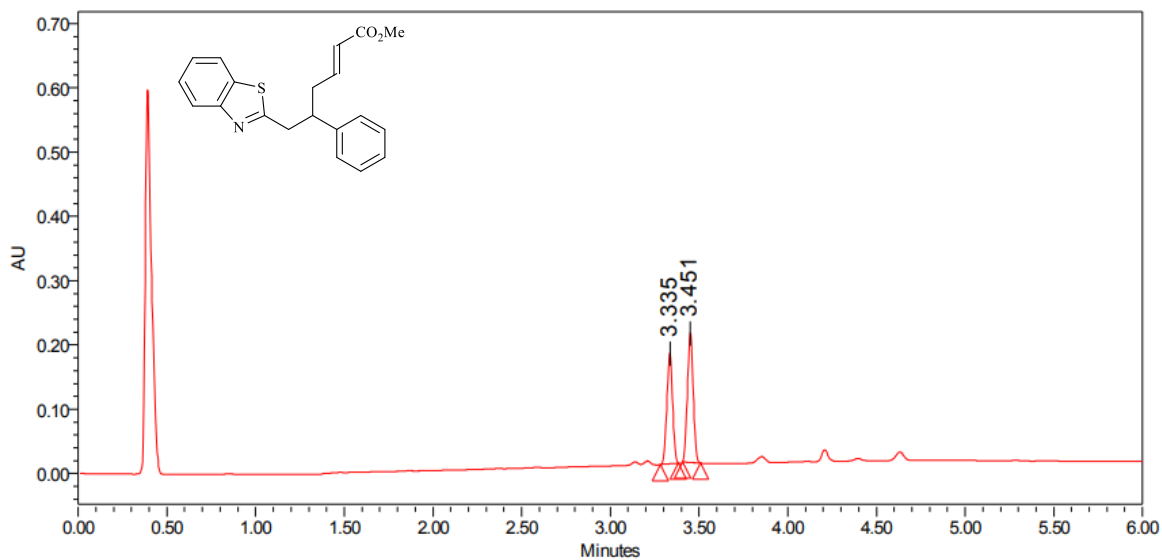

### Peak Results

|   | RT    | % Area |
|---|-------|--------|
| 1 | 3.335 | 45.70  |
| 2 | 3.451 | 54.30  |

## Enantioenriched sample

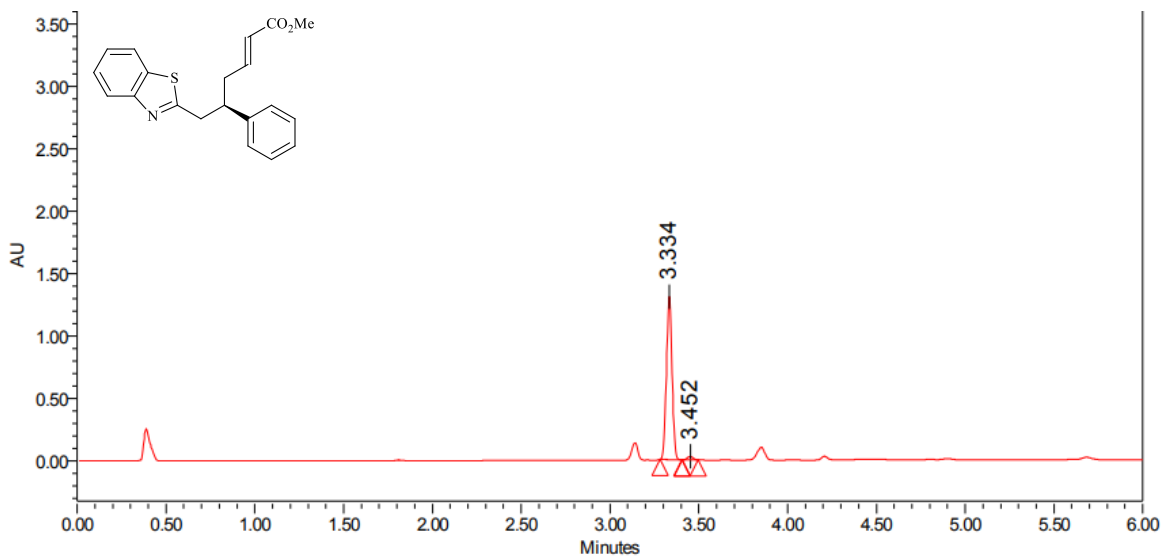

### Peak Results

|   | RT    | % Area |
|---|-------|--------|
| 1 | 3.334 | 97.84  |
| 2 | 3.452 | 2.16   |

# Methyl (*R*)-5-phenyl-6-(pyridin-2-yl)hexanoate 13

## Racemic sample

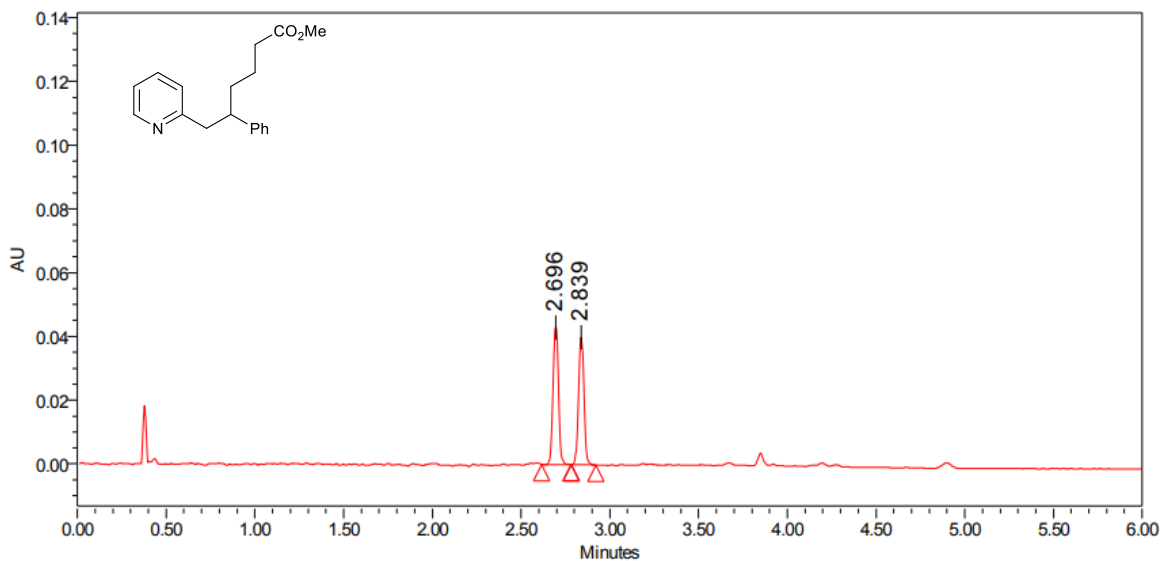

### Peak Results

|   | RT    | % Area |
|---|-------|--------|
| 1 | 2.696 | 52.11  |
| 2 | 2.839 | 47.89  |

## Enantioenriched sample

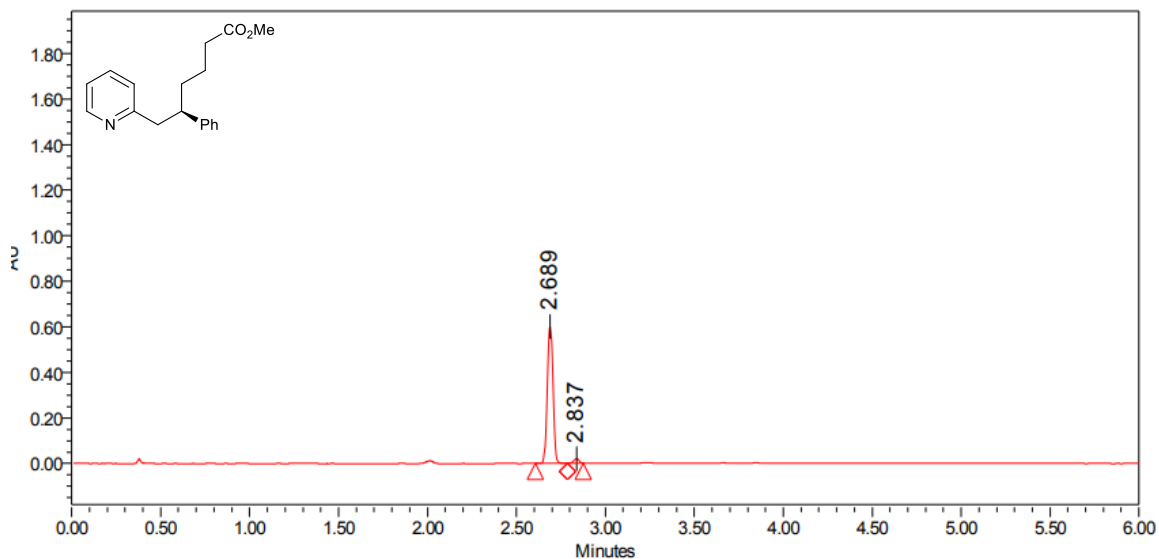

### Peak Results

|   | RT    | % Area |
|---|-------|--------|
| 1 | 2.689 | 96.91  |
| 2 | 2.837 | 3.09   |



# (*R,E*)-2-(6-Methoxy-6-oxo-2-phenylhex-4-en-1-yl)pyridine 1-oxide 14

## Racemic sample

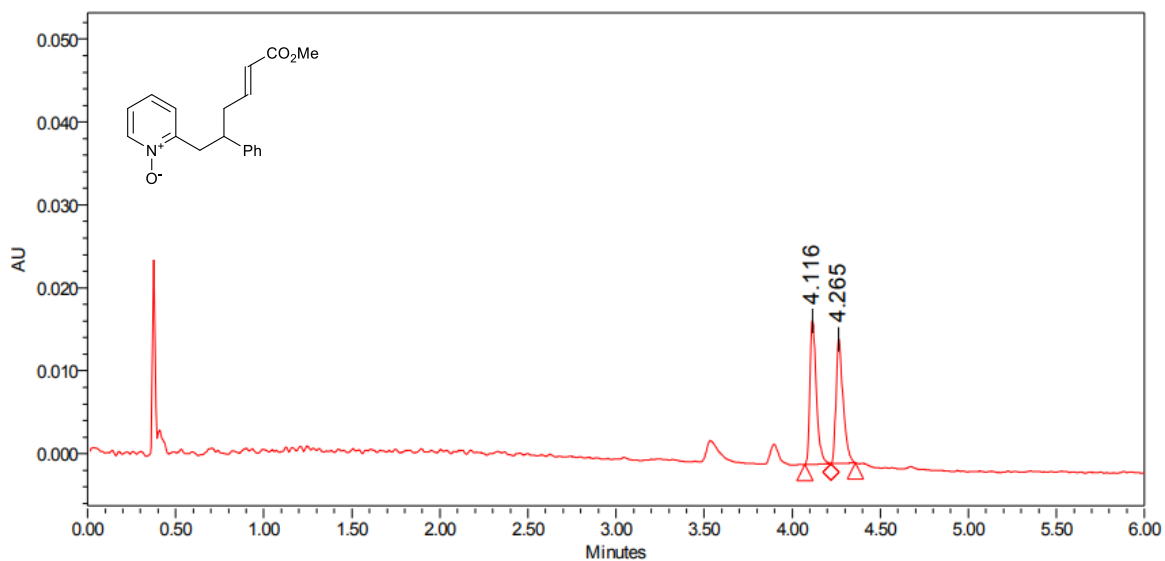

### Peak Results

|   | RT    | % Area |
|---|-------|--------|
| 1 | 4.116 | 51.32  |
| 2 | 4.265 | 48.68  |

## Enantioenriched sample

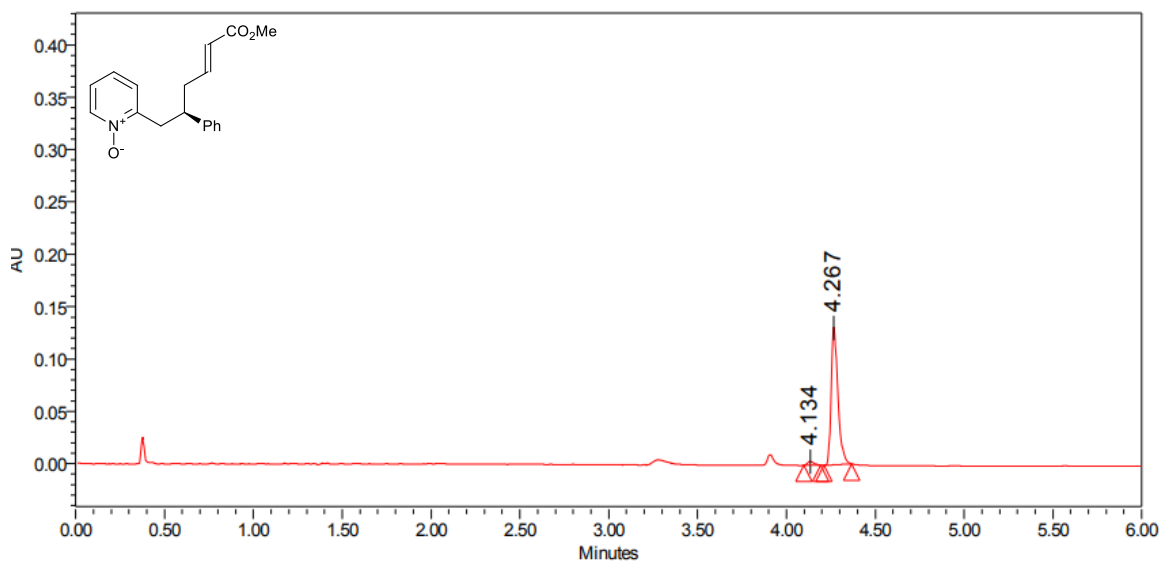

### Peak Results

|   | RT    | % Area |
|---|-------|--------|
| 1 | 4.134 | 2.54   |
| 2 | 4.267 | 97.46  |

# Methyl (S)-3-phenyl-4-(pyridin-2-yl)butanoate 15

## Racemic sample

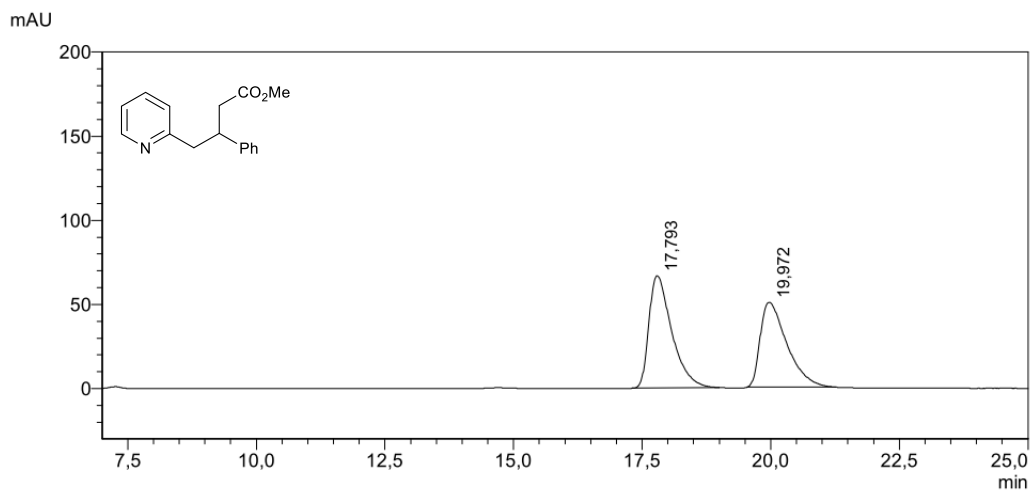

| PDA Ch2 266nm |           |         |
|---------------|-----------|---------|
| Peak#         | Ret. Time | Area%   |
| 1             | 17,793    | 53,189  |
| 2             | 19,972    | 46,811  |
| Total         |           | 100,000 |

## Enantioenriched sample

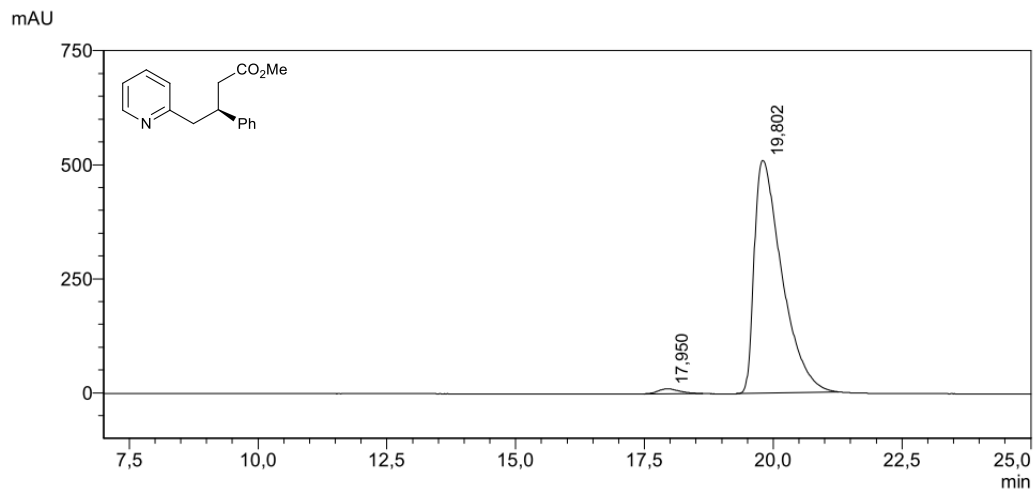

| PDA Ch2 200nm |           |         |
|---------------|-----------|---------|
| Peak#         | Ret. Time | Area%   |
| 1             | 17,950    | 1,590   |
| 2             | 19,802    | 98,410  |
| Total         |           | 100,000 |

# *(R)*-*N*-(3-Phenyl-4-(pyridin-2-yl)butyl)aniline 16

Racemic sample

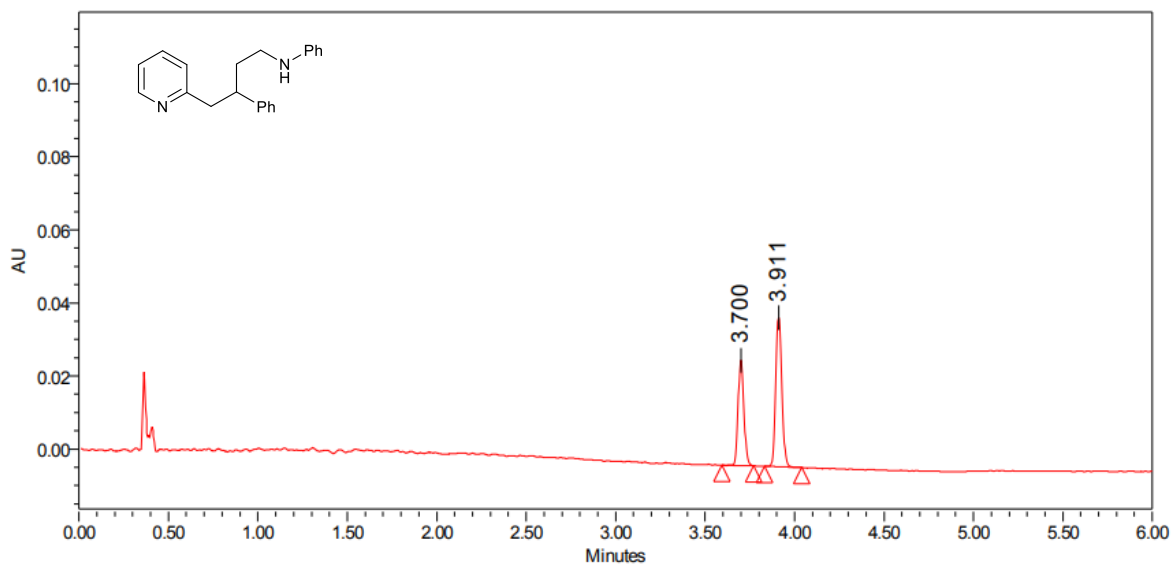

## Peak Results

|   | RT    | % Area |
|---|-------|--------|
| 1 | 3.700 | 39.97  |
| 2 | 3.911 | 60.03  |

Enantioenriched sample

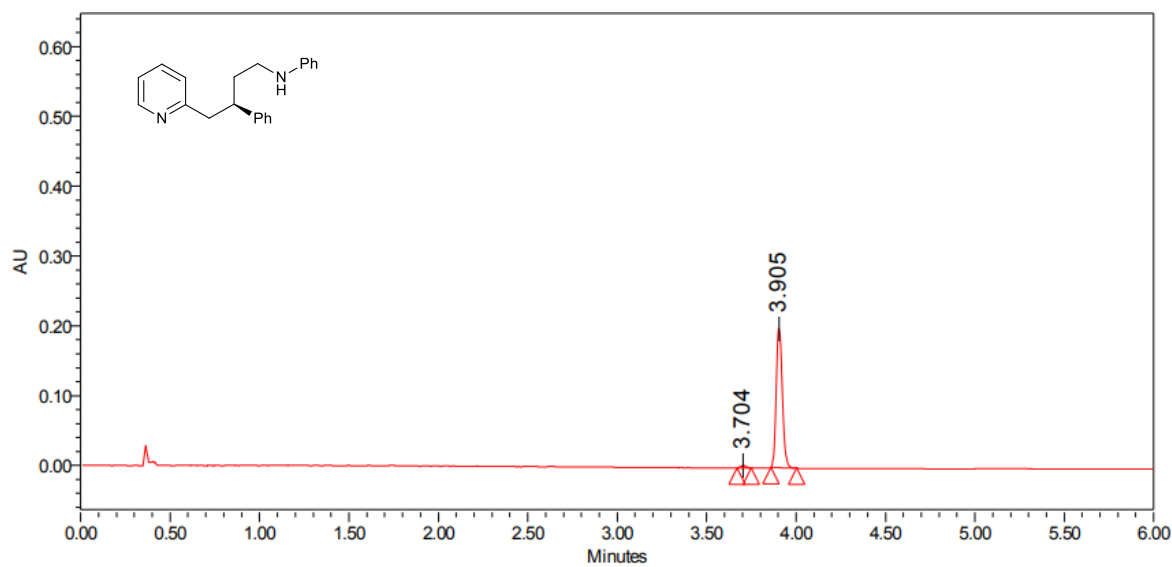

## Peak Results

|   | RT    | % Area |
|---|-------|--------|
| 1 | 3.704 | 1.50   |
| 2 | 3.905 | 98.50  |

## 10. Mechanistic considerations using MS analysis

In order to clarify the assumed reaction mechanism, MS analysis was performed. An In an ordinary 4 mL glass vial equipped with a magnetic stirring bar, 2-pyridylacetic acid hydrochloride **1a** (17.3 mg; 0.1 mmol),  $\alpha,\beta$ -unsaturated aldehyde **2** (0.1 mmol) and catalyst **4c** (6.0 mg, 0.01 mmol) were placed. Subsequently, dichloromethane (0.2 mL) and sodium acetate (8.2 mg, 0.1 mmol) were added. The resulting mixture was stirred at room temperature for 2 hours, the sample was taken (10  $\mu$ L), diluted with MeOH (1 mL) and subjected to MS analysis [cationic mode, calculated for  $C_6H_7N$  (+H): 94, found: 94].

Spectrum Name: 513-1  
Start Ion: 50  
End Ion: 500  
Source: ESI + 3.5kV 350C  
Capillary: 180V 300C Offset: 30V Span: 20V

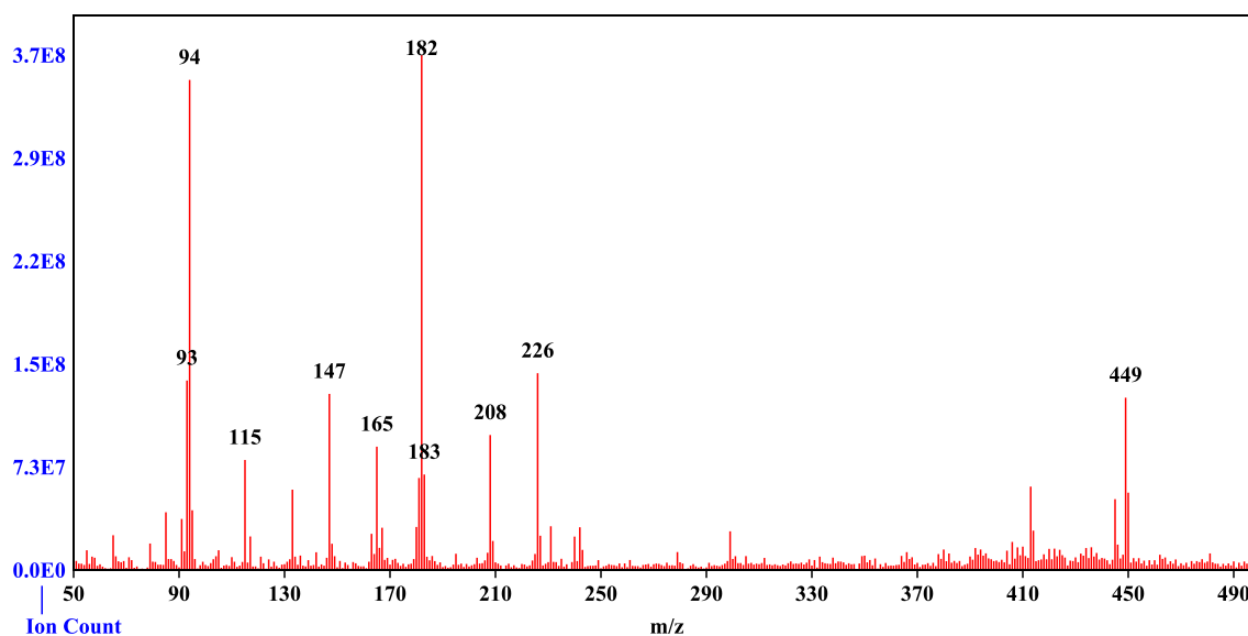

## 11. Additional scope experiment

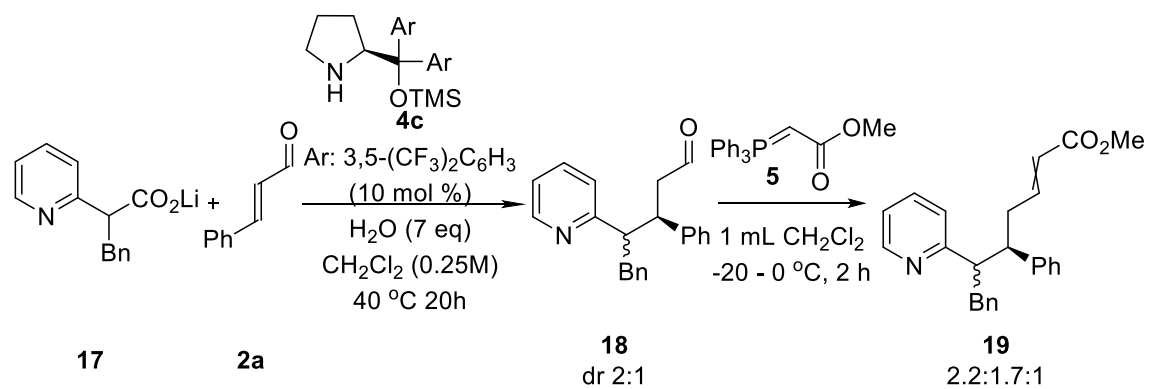

Supplement: d0cc08182e1.pdf [file d0cc08182e1.pdf]
